1 **Gut bacterial diversity and physiological traits of *Anastrepha fraterculus* Brazilian-1**  
2 **morphotype males are affected by antibiotic treatment**

3 M. Laura Juárez<sup>1,2,3\*</sup>, Lida E. Pimper<sup>4\*</sup>, Guillermo E. Bachmann<sup>3,4</sup>, Claudia A. Conte<sup>4</sup>, M.  
4 Josefina Ruiz<sup>1,3</sup>, Lucía Goane<sup>1,3</sup>, Pilar Medina Pereyra<sup>5</sup>, Felipe Castro<sup>5</sup>, Julieta Salgueiro<sup>4</sup>, Jorge  
5 L. Cladera<sup>4</sup>, Patricia E. Fernández<sup>3,6</sup>, Kostas Bourtzis<sup>7</sup>, Silvia B. Lanzavecchia<sup>4</sup>, M. Teresa  
6 Vera<sup>1,3</sup> & Diego F. Segura<sup>3,4#</sup>

7  
8 **\*Shared first authors**

9 <sup>1</sup>Cátedra Terapéutica Vegetal, Facultad de Agronomía y Zootecnia (FAZ), Universidad Nacional  
10 de Tucumán (UNT), Tucumán, Argentina; <sup>2</sup>Unidad Ejecutora Lillo, Fundación Miguel Lillo,  
11 Tucumán, Argentina; <sup>3</sup>Consejo Nacional de Investigaciones Científicas y Técnicas  
12 (CONICET); <sup>4</sup>Instituto de Genética Ewald A. Favret (IGEAF), Instituto Nacional de Tecnología  
13 Agropecuaria (INTA), Castelar, Argentina; <sup>5</sup>Instituto de Fisiología Animal, Fundación Miguel  
14 Lillo, Tucumán, Argentina; <sup>6</sup>Estación Agropecuaria Delta, Instituto Nacional de Tecnología  
15 Agropecuaria (INTA), Argentina ; <sup>7</sup>Insect Pest Control Laboratory, Joint FAO/IAEA Division of  
16 Nuclear Techniques in Food and Agriculture, Vienna, Austria.  
17

18  
19 M. Laura Juárez: [lau\\_zoo@yahoo.com.ar](mailto:lau_zoo@yahoo.com.ar)  
20 Lida E. Pimper: [liditas@gmail.com](mailto:liditas@gmail.com)  
21 Guillermo E. Bachmann: [guillermobachmann@gmail.com](mailto:guillermobachmann@gmail.com)  
22 Claudia A. Conte: [clauconte@yahoo.com.ar](mailto:clauconte@yahoo.com.ar),  
23 M. Josefina Ruiz: [josefinaruiz2802@hotmail.com](mailto:josefinaruiz2802@hotmail.com),  
24 Lucía Goane: [lugoane@gmail.com](mailto:lugoane@gmail.com),  
25 Pilar Medina Pereyra: [licpilarmedina@hotmail.com](mailto:licpilarmedina@hotmail.com),  
26 Felipe Castro: [felipecastrobiologo@gmail.com](mailto:felipecastrobiologo@gmail.com),  
27 Julieta Salgueiro: [salgueirojuliet@gmail.com](mailto:salgueirojuliet@gmail.com),  
28 Jorge L. Cladera: [cladera.jorge@inta.gob.ar](mailto:cladera.jorge@inta.gob.ar),  
29 Patricia E. Fernández: [pcfernan@agro.uba.ar](mailto:pcfernan@agro.uba.ar),  
30 Kostas Bourtzis: [k.bourtzis@iaea.org](mailto:k.bourtzis@iaea.org),

31 Silvia B. Lanzavecchia: [lanzavecchia.silvia@inta.gob.ar](mailto:lanzavecchia.silvia@inta.gob.ar),

32 M. Teresa Vera: [teretina@hotmail.com](mailto:teretina@hotmail.com),

33 Diego F. Segura: [segura.diego@inta.gob.ar](mailto:segura.diego@inta.gob.ar)

34

35

36 **#Correspondence:** Diego F. Segura. Tel./fax: +54 11 44500805;

37 e-mail: [segura.diego@inta.gob.ar](mailto:segura.diego@inta.gob.ar)

38

39

40

41

42

43

#### 44 **Abstract**

45 **Background:** The interaction between gut bacterial symbionts and Tephritidae became the focus  
46 of several studies that showed that bacteria contributed to the nutritional status and the  
47 reproductive potential of its fruit fly hosts. *Anastrepha fraterculus* is an economically important  
48 fruit pest in South America. This pest is currently controlled by insecticides, which prompt the  
49 development of environmentally friendly methods such as the sterile insect technique (SIT). For  
50 SIT to be effective, a deep understanding of the biology and sexual behavior of the target species  
51 is needed. Although many studies have contributed in this direction, little is known about the  
52 composition and role of *A. fraterculus* symbiotic bacteria. In this study we tested the hypothesis  
53 that gut bacteria contribute to nutritional status and reproductive success of *A. fraterculus* males.

54 **Methods:** Wild and laboratory-reared males were treated with antibiotics (AB) and provided  
55 sugar (S) or sugar plus protein (S+P) as food sources. The effect of AB on the gut bacteria  
56 diversity was assessed through DGGE and sequencing of the V6-V9 variable region of the  
57 bacterial 16S *rRNA* gene.

58 **Results:** AB affected the bacterial community of the digestive tract of *A. fraterculus*, in particular  
59 bacteria belonging to the Enterobacteriaceae family, which was the dominant bacterial group in  
60 the control flies (i.e., non-treated with AB). AB negatively affected parameters directly related to  
61 the mating success of laboratory males and their nutritional status. AB also affected males'  
62 survival under starvation conditions. The effect of AB on the behaviour and nutritional status of  
63 the males depended on two additional factors: the origin of the males and the presence of a  
64 proteinaceous source in the diet.

65 **Conclusions:** our results suggest that *A. fraterculus* males gut contain symbiotic organisms that  
66 are able to exert a positive contribution on *A. fraterculus* males' fitness, although the  
67 physiological mechanisms still need further studies.

68 **Key words:** South American fruit fly, symbiont, antibiotics, nutritional reserves, survival, Sterile  
69 Insect Technique

70

71

## 72 **Background**

73 Insects maintain a close and complex association with microbial communities, ranging from  
74 parasitic relationships to commensalism and obligate mutualism [1, 2]. The contributions of gut  
75 bacteria to their insect hosts are diverse [see 3 for a review], but probably the most important is  
76 associated to its nutrition. Insects use the metabolic pathways of bacteria to obtain nutritional  
77 resources otherwise unavailable and thus are able to survive on suboptimal or nutrient-poor diets  
78 [3-6]. Bacterial symbionts have also been shown to have a protective function of their insect  
79 hosts, to the point that are considered to act as an additional immune system [4, 7, 8]. Although  
80 the way that this occurs is still unknown in most cases [3], Brownlie and Johnson [8] describe the  
81 production of toxins or antibiotics by gut bacteria that would protect the host against pathogens.  
82 Other benefits include improving digestion efficiency, the acquisition of digestive enzymes, some  
83 of them associated with detoxification, and the provision of vitamins, nitrogen, specific amino  
84 acids and carbon [4]. Bacterial symbionts have also been shown to contribute with chemical  
85 compounds that participate in the communication between the hosts and other individuals,  
86 present either in the volatiles emitted or retained in the insect cuticle [3, 4, 9]. Moreover, the  
87 presence of gut bacteria has been associated to the improvement of developmental and  
88 reproductive parameters, such as mating behavior [3, 10].

89         The study of the interactions that bacteria and their hosts establish has followed different  
90 experimental approaches [6]. One of these approaches is to phenotypically characterize the  
91 bacterial community present in the gut by culture-dependent techniques or to determine its  
92 function inferred from their genome sequence by culture-independent molecular methods [11-  
93 18]. Another indirect way to assess the effect of gut bacteria is to evaluate the effect of adding  
94 antibiotics (AB) into the insect diets and compare parameters associated to the fitness of AB-

95 treated and non-treated insects [5, 19-23]. Alternatively, other studies have taken a more direct  
96 approach in which insects were fed specific bacterial species to determine potential benefits  
97 associated with the increase of bacteria titers in their gut [10, 24-31].

98         The sterile insect technique (SIT) is an environmentally friendly and species-specific  
99 control method commonly used against tephritid fruit fly pests. The SIT consists of mass  
100 production, sterilization, and release of males to mate with wild females [32, 33]. For an effective  
101 implementation of the SIT, a deep understanding of the biology of the targeted species is needed,  
102 particularly its sexual behavior [33]. Thus, the interaction between gut bacteria and fruit flies has  
103 become the focus of several studies in recent years. Combining traditional microbiological  
104 methods and molecular techniques, the composition of the bacterial community associated to  
105 Tephritidae fruit flies has been characterized for some species. Studies on *Ceratitis capitata*  
106 Wiedemann, the Mediterranean fruit fly, showed that gut bacterial community is comprised  
107 mainly by members of the family Enterobacteriaceae [10, 12, 34, 35]. However, the  
108 monophagous olive fruit fly *Bactrocera oleae* Gmelin is characterized by the presence of the  
109 obligatory symbiont *Candidatus* Erwinia dacicola that colonize a specialized evagination of the  
110 digestive tract while in the gut a limited number of the bacterial species have been reported such  
111 as *Acetobacter tropicalis* [36-38]. Through indirect (AB treatment) or direct (feeding larvae or  
112 adults) approaches, gut bacteria were shown to contribute to several biological parameters of  
113 their hosts, such as longevity [20, 22, 27], fecundity [5, 21, 29], development, productivity and  
114 mating success [10, 19, 25, 27, 30, 31, 39]. The South American fruit fly, *Anastrepha fraterculus*  
115 Wiedemann (Diptera: Tephritidae), is a major pest causing considerable damage to a wide  
116 spectrum of host fruit species, many of them of economic importance [40, 41]. Currently, the  
117 only control method for this species is through the use of insecticides which prompt the  
118 development of alternative control methods such as the SIT. The efficacy of the technique

119 depends on the mating success of males released in the field. Many studies so far have provided  
120 valuable information in this regard [42-49]. However, despite the important role that gut bacteria  
121 have on the development, productivity and the reproductive success of other Tephritidae flies, no  
122 study addressed the significance of these interactions for *A. fraterculus* so far. Because  
123 understanding how bacterial symbionts affect the overall fitness of sterile males may contribute  
124 to the efficacy of the SIT, in the present study, and as an initial approach, we tested the  
125 hypothesis that gut bacteria contribute to nutritional and reproductive aspects of wild and  
126 laboratory-reared *A. fraterculus* males from the Brazilian-1 morphotype. Following an indirect  
127 approach, we tested the effect of AB treatment on several parameters associated to males'  
128 reproductive success such as male sexual performance, and sexual communication mediated by  
129 chemical signals and behavioral displays. Also, the nutritional status and the starvation resistance  
130 of AB treated and non-treated males were evaluated. In parallel, the effect of AB on the gut  
131 bacteria diversity was assessed through molecular techniques. As previous studies in other  
132 species have shown that the dietary regime, particularly the protein content of the adult diet,  
133 interacts with the presence of gut bacteria, we carried out the above experiments providing a  
134 complete diet (sugar and a protein source) and a nutritionally poor diet that contained only sugar.

## 135 **Results**

### 136 *Diet consumption*

137 The presence of AB had no impact on diet consumption, irrespectively of the origin of the flies or  
138 the diet given ( $F_{1,2} = 0.02$ ,  $P = 0.9107$  for S fed lab males;  $F_{1,2} = 6.52$ ,  $P = 0.1252$  for S+P fed lab  
139 males;  $F_{1,2} = 1.35$ ,  $P = 0.3655$  for S fed wild males;  $F_{1,2} = 0.10$ ,  $P = 0.7776$  for S+P fed wild  
140 males) (Fig. 1).

141 *Molecular characterization of gut bacteria*

142 Total DNA from single *A. fraterculus* guts was used to describe the bacterial community  
143 associated to male flies from different origin, types of food and AB treatment using molecular  
144 tools. The V6-V9 region of the bacterial 16S *rRNA* gene was amplified by PCR using universal  
145 primers. 27 bands of approximately 420 bp were excised from the DGGE gels, and 14 PCR  
146 fragments were successfully sequenced to identify the associated bacterial taxonomic groups. The  
147 nucleotide sequences obtained for the rest of the PCR products (13) presented double peaks and  
148 low quality, showing the potential presence of several amplicons in the same sample. The results  
149 of differential band sequencing obtained from the different combinations of treatments showed  
150 the presence of microorganisms closely related to the Proteobacteria, distributed as:  
151 Gamaproteobacteria, 71% and Alphaproteobacteria, 29% of the total bands (Table 1, Additional  
152 files 1; Fig. S1). The use of both distance matrix (Fig. 2) and character-based (parsimony, data  
153 not shown) methods resulted in the construction of similar phylogenetic trees. All bacterial  
154 strains were phylogenetically related to taxonomic groups of Proteobacteria (linked to  
155 Enterobacterales, Xanthomonadales and Alphaproteobacteria class) (Fig. 2), in accordance with  
156 the closest relatives found using RDP/Blast search (Table 1). The analysis of the sequences  
157 revealed that the Enterobacteriaceae family is the dominant bacterial group in the *A. fraterculus*  
158 gut, in both wild and lab flies (S or S+P diet). AB treated flies (wild and lab) fed with a S+P diet  
159 contained species of the genus *Stenotrophomonas* sp., and Alphaproteobacteria class; whereas  
160 AB treated flies (wild and lab) fed with sugar contained only species of the Alphaproteobacteria  
161 class (Table 1; Fig. 2).



162 *Male mating competitiveness*

163 Overall, the mean percentage of copulations achieved by wild males was not affected by AB ( $F_{1,2}$   
164 = 0.16,  $P = 0.7299$  for S fed males;  $F_{1,4} = 1.31$ ,  $P = 0.3163$  for S+P fed males). In contrast, for lab  
165 males, the effect of AB depended on the diet. AB had a significantly negative impact on  
166 percentage of mating for S+P fed males ( $F_{1,3} = 18.71$ ,  $P = 0.0228$ ) while for males fed with S  
167 diet, the differences were not significant ( $F_{1,2} = 0.46$ ,  $P = 0.5689$ ) (Fig. 3A). Latency to mate was  
168 not significantly affected by AB neither for wild ( $W = 366.5$ ,  $P = 0.1590$  for S fed males;  $W =$   
169  $4814.5$ ,  $P = 0.1000$  for S+P fed males) nor for lab males ( $W = 2762$ ,  $P = 0.5256$  for S fed males;  
170  $W = 3857.5$   $P = 0.9155$  for S+P fed males) (Fig. 3B). Copula duration was also not significantly  
171 affected by AB ( $F_{1,107} = 1.29$ ,  $P = 0.2587$  for S fed lab males;  $F_{1,128} = 0.12$ ,  $P = 0.7291$  for S+P  
172 fed lab males;  $F_{1,36} = 1.67$ ,  $P = 0.2048$  for S fed wild males;  $F_{1,128} = 0.90$ ,  $P = 0.3441$  for S+P fed  
173 wild males) (Fig. 3C).

174 *Male calling behavior*

175 Behavioral recordings showed that for S fed males, AB affected the mean number of wing  
176 fanning and salivary gland exposure ( $t = 2.148$ , d.f. = 14,  $p = 0.024$ ; and  $t = 1.870$ , d.f. = 14,  $p =$   
177  $0.041$ , respectively). For the two variables, males without AB performed these courtship-related  
178 behaviors more frequently than AB males (Fig. 4A, B). On the other hand, AB did not affect  
179 wing fanning or gland exposure in S+P fed males ( $t = 0.100$ , d.f. = 14,  $p = 0.461$ ; and  $t = 0.387$ ,  
180 d.f. = 14,  $p = 0.352$ , respectively) (Fig. 4A, B).

181 *Male volatile and cuticle compounds*

182 Ten compounds were quantified in the volatile collections of *A. fraterculus* males. For S fed  
183 males, we detected significantly higher amounts of three compounds (E-E- $\alpha$ -farnesene,  
184 anastrephin, epianastrephin) in the volatiles' collections compared to S+AB fed males, whereas

185 the remaining seven compounds showed no significant differences (Table 2). For males S+P  
186 males, no significant differences were detected for any of the 10 compounds between AB treated  
187 and non-treated males (Table 2). When antennally active compounds were combined, S fed males  
188 that were treated with AB released significantly less amount of these compounds than non-treated  
189 males whereas no differences between treated and non-treated males were detected for S+P males  
190 (Table 2).

191 Fifteen compounds were quantified in the cuticle extracts of *A. fraterculus* males. We  
192 did not detect significant differences between AB treated and non-treated males in any compound  
193 for any of the two diets (Table 3). The same result was found when antennally active compounds  
194 were added (Table 3).

#### 195 *Starvation resistance*

196 Laboratory males fed on S and treated with AB lived longer under starvation than S-fed non-  
197 treated males ( $\chi^2 = 5.28$ ,  $p = 0.0215$ ). For S+P males, AB treatment had no effect ( $\chi^2 = 2.28$ ,  $p =$   
198  $0.1311$ ) (Fig. 5A). Conversely, S fed wild males treated with AB lived less than non-treated  
199 males ( $\chi^2 = 4.94$ ,  $p = 0.0263$ ). Similarly to lab males, AB had no impact on starvation resistance  
200 in S+P fed wild males ( $\chi^2 = 1.39$ ,  $p = 0.2369$ ) (Fig. 5B).

#### 201 *Dry weight*

202 Antibiotics did not affect the adult dry weight both for lab and wild males ( $F_{1,10} = 1.92$ ,  $P =$   
203  $0.1962$  for S fed lab males;  $F_{1,10} = 0.25$ ,  $P = 0.6263$  for S+P fed lab males;  $F_{1,10} = 0.13$ ,  $P =$   
204  $0.7227$  for S fed wild males;  $F_{1,10} = 1.68$ ,  $P = 0.2235$  for S+P fed wild males) (Fig. 6).

## 205 *Nutritional reserves*

206 Antibiotic treatment had no effect on total sugar content in any combination of male origin and  
207 diet ( $F_{1,4} = 1.19$ ,  $P = 0.3375$  for S fed lab males;  $F_{1,4} = 3.12$ ,  $P = 0.1522$  for S+P fed lab males;  
208  $F_{1,4} = 0.001$ ,  $P = 0.9769$  for S fed wild males;  $F_{1,4} = 1.23$ ,  $P = 0.3297$  for S+P fed wild males)  
209 (Fig. 7A). Likewise, AB had no impact on the glycogen content for both origins and type of diets  
210 ( $F_{1,4} = 0.94$ ,  $P = 0.3876$  for S fed lab males;  $F_{1,4} = 1.35$ ,  $P = 0.3103$  for S+P fed lab males;  $F_{1,4} =$   
211  $0.30$ ,  $P = 0.6144$  for S fed wild males;  $F_{1,4} = 7.23$ ,  $P = 0.0547$  for S+P fed wild males) (Fig. 7B).  
212 The analysis of protein content showed a negative effect of AB for S+P fed lab males ( $F_{1,4} =$   
213  $53.33$ ,  $P = 0.002$ ) (Fig. 7C). For the rest of the treatments, no significant differences in protein  
214 content were detected between diets containing or not AB ( $F_{1,4} = 2.90$ ,  $P = 0.1637$  for S fed lab  
215 males;  $F_{1,4} = 0.01$ ,  $P = 0.9222$  for S fed wild males; S+P:  $F_{1,4} = 0.42$ ,  $P = 0.5532$  for S+P fed wild  
216 males) (Fig. 7C). Lipid content was also negatively affected by AB for S+P fed lab males ( $F_{1,4} =$   
217  $18.41$ ,  $P = 0.0127$ ) (Fig. 7D). For the remaining combinations, no differences were found in the  
218 lipid content between AB treated and non-treated males ( $F_{1,4} = 3.62$ ,  $P = 0.1298$  for S fed lab  
219 males;  $F_{1,4} = 0.07$ ,  $P = 0.8095$  for S fed wild males;  $F_{1,4} = 0.18$ ,  $P = 0.6938$  for S+P fed wild  
220 males) (Fig. 7D).

## 221 **Discussion**

222 Symbiotic bacteria play an important role in the development and biology of many insect species.  
223 Recently, an increasing number of studies have focused on the interaction between bacteria and  
224 Tephritidae fruit flies [e.g, 5, 14, 19-23, 25, 27]. Our data suggest that bacteria might affect in a  
225 positive way several parameters directly related to the mating success of laboratory *A. fraterculus*  
226 males, as well as their nutritional status, but would negatively affect their survival under

227 starvation. Specifically, this is supported by the fact that ingestion of antibiotic was associated to  
228 detrimental effect in males fed on both types of diet. In S fed males, AB produced a decrease in  
229 their sexual display rate, a decrease in the amount of three pheromonal compounds and a mild  
230 reduction in mating competitiveness. For S+P males, AB affected the amount of copulas obtained  
231 by males, which was correlated with a decrease of protein content. The effect of AB on fitness  
232 related parameters depended on two additional factors: the origin of the males (wild or lab) and  
233 the presence of a proteinaceous source in the adult diet. Nonetheless, it is important to mention  
234 that our results were obtained by an indirect approach under which males received AB as a means  
235 of disrupting symbiotic association with bacteria. Even when we found a drastic change in the gut  
236 microbiota, and we associated this with a reduction of the overall fitness of the males, AB could  
237 have also affected the mitochondria [50] causing (or at least contributing to) a decrease in mating  
238 success and related parameters. This is a limitation of the current experimental approach and  
239 should be considered in further studies, for example by inoculating specific bacteria to the diet.  
240 This approach has shown promising results in different fruit fly species, such as *Dacus ciliatus*  
241 (Loew) [51], *C. capitata* [10, 27, 30, 31] and *B. oleae* [29].

242

#### 243 *Analysis of the gut's bacterial community and the effect of antibiotic treatment*

244 We found that the incorporation of AB in the adult diet affected the bacterial community of the  
245 digestive tract of *A. fraterculus* males. Similar results were obtained for another fruit flies like *C.*

246 *capitata* and *B. oleae* subjected to similar antibiotic trials [5, 19-23] . In our experiments, the  
247 presence of AB had no impact on the decision to feed on a given food source. This shows neither  
248 a phagostimulant nor a deterrent effect of adding AB into the diet. DGGE followed by  
249 sequencing showed a dominant representation of the Enterobacteriaceae family in the *A.*  
250 *fraterculus* male gut, as has been previously evidenced for other fruit fly species (see [52] for a  
251 review). Some of these microbial taxonomic groups are composed by diazotrophic bacteria (i.e.,  
252 nitrogen fixers) with an essential function in the acquisition of nitrogen compounds and carbon  
253 metabolism, allowing both sexes to reach their reproductive potential [12, 13, 53-55]. The strong  
254 impact of AB on potentially key symbiotic bacteria evidenced in males, suggest a similar  
255 approach could provide relevant information on the role of gut bacteria in females as well.  
256 Antibiotics appear to have drastically affected the gut enterobacterial diversity, since other  
257 taxonomic classes (e.g., *Klebsiella sp.*, *Enterobacter sp.* and *Serratia sp.*) were not detected in  
258 adult males' flies under AB treatment. These differences in the gut bacterial community found  
259 between AB-treated and non-treated individuals were also supported by the linkage dendrogram  
260 analysis of DGGE profiles. This reduction in gut bacterial diversity, associated to physiological  
261 changes in the host has been previously reported for Tephritidae fruit flies [5, 19, 20, 21] as well  
262 as for other insect species [56].

263 *Impact of antibiotic treatment on reproductive parameters, nutritional status and starvation*  
264 *resistance*

265 *Anastrepha fraterculus*, similarly to other tephritid species, presents a lek based mating system  
266 [43, 57] in which males aggregate and perform sexual displays (calling behavior) to attract  
267 females to a mating arena that has neither resources nor refuges [58]. The sexual display involves  
268 acoustic, chemical and visual signals (e.g., wing fanning, the extrusion of the salivary glands and

269 protrusion of the anal tissue) [59], and is therefore an energetically demanding task ([60],  
270 reviewed in [61]). This means that adults need to acquire specific nutrients in order to complete  
271 their sexual development [54, 61, 62]. Numerous studies have found that protein intake has a  
272 positive impact on the reproductive success of *C. capitata* males, affecting their ability to  
273 participate in leks [63], to emit pheromone [64, 65], to transfer a substantial ejaculate [66] and to  
274 decrease female receptivity [67]. In the same way, studies with other *Anastrepha* species showed  
275 that protein intake results in an improvement of male's sexual competitiveness [46, 62, 68, 69],  
276 as well as an increase in the amount of pheromone released by males [70]. In the present study  
277 we found significant differences in the amount of lipids and proteins between lab males that were  
278 fed with AB and those that were not, for S+P treatment. For both nutrients, the addition of AB to  
279 the diet had a negative effect on the nutritional reserves compared to males that retained their gut  
280 bacteria. The effect of AB on the nutritional reserves of S+P fed lab males correlates with a  
281 significant decrease of the amount of copulas reached by these males compared to non-treated  
282 males. Ben-Yosef et al. [19] also observed for S+P fed males a decrease (although not  
283 significant) in the reserves of protein after the addition of AB and an impact on mating related  
284 variables (see below).

285         The higher mating competitiveness in S+P fed non-treated lab males was not associated to  
286 higher rates of sexual displays or sex pheromone emission. Henceforth, it seems that females  
287 were able to assess the nutritional status of the males, in spite of the lack of differences in these  
288 components of the courtship, maybe using more subtle, close range signals that were not recorded  
289 in this study. For several tephritid species, acoustic communication has major implications on  
290 mating success. For instance, in several *Anastrepha* species the sound produced by repeated  
291 bursts of wing-fanning generates pulse trains that stimulate the females [71-75]. Likewise,  
292 behavioral male-male or male-female interactions (e.g., movements, fights or contacts) could be

293 influencing female choice [59]. In our case, females could have used multiple signals to assess  
294 males' quality, rejecting those of poor quality related to a low amount of protein as result of a  
295 change in their gut bacteria community [52]. Alternatively, males with larger reserves could be  
296 more aggressive in defending small territories, a parameter that was not assessed in our  
297 experiments. Observations at a finer scale (like video or sound recordings) and also at a higher  
298 scale (like field cages with host trees inside) may help to reveal the targets of female choice that  
299 could be affected (directly or indirectly) by gut bacteria.

300         Several studies tested the hypothesis that bacteria contribute to mating success of *C.*  
301 *capitata*. Most of them followed a direct approach adding specific bacterial strains as probiotics  
302 into artificial diets and showed an increase in male mating success [27, 30, 39] with some  
303 exceptions [25, 31]. Ben-Ami et al. [39] found that irradiation of *C. capitata* pupae affected the  
304 abundance of adult gut bacteria, more specifically *Klebsiella oxytoca*, and this was associated to a  
305 reduction of male mating success. Following an indirect approach, as the one used in the present  
306 study, Ben Yosef et al. [19] found that *C. capitata* males that were fed antibiotics needed more  
307 time to mate (higher latency times) than males that did not received antibiotics, and only when  
308 the diet contained protein, as no effect of antibiotics was detected for sugar fed males. According  
309 to the same study, bacteria could be involved in the production of a more attractive sexual signal  
310 (not analyzed), which may have been mediated by a protein-bacterial interaction [19]. This study  
311 on *C. capitata*, and the results of the present one on *A. fraterculus*, showed that the manipulation  
312 of symbiotic bacteria in S+P fed males affected their nutritional reserves, and this was associated  
313 with a decrease of their mating competitiveness, although the precise mechanism by which  
314 females respond to these changes is still unknown and differences in the variable in which this  
315 was expressed (i.e., latency or mating percentage) can be attributed to differences in the species  
316 under study.

317           Antibiotic treatment also affected parameters associated to the sexual behavior of *S* fed *A.*  
318 *fraterculus* lab males. For these nutritionally stressed males, AB significantly decrease the rate of  
319 sexual displays (wing fanning and exposure of salivary glands) and the amount of three  
320 antennally active compounds of the male sex pheromone. Additionally, AB treated males fed on  
321 sugar obtained numerically less copulas than non-treated males, even though the differences were  
322 not statistically significantly. However, in this case there was no significant difference in any of  
323 the analyzed nutrients. Although bacteria do not seem to impact on the nutritional status of *S* fed  
324 males when lipids, carbohydrates and protein were measured, they still could be contributing  
325 with other essential nutrients that allow fruit flies to fill 'deficiency gaps' (*sensu* [52]) or even to  
326 certain essential aminoacids. For example, Ben-Yosef et al. [5, 21] found that the fecundity of  
327 females was significantly enhanced by the presence of gut bacteria when flies were fed with a  
328 diet containing only non-essential amino acids. This hypothesis needs further research, as it may  
329 help to better understand the role of bacteria and even try to supplement artificial diets with  
330 specific nutrients as to improve flies' quality with pest management purposes. In any case,  
331 through an indirect approach (i.e., antibiotic treatment) it was possible to observe the benefits of  
332 symbiotic bacteria in males fed on poor diets.

333           When nutritional reserves and parameters associated to the sexual success of *A.*  
334 *fraterculus* were analyzed in wild males, no significant differences were found. However, the  
335 addition of AB resulted in a lower, but not statistically different, protein content in S+P fed  
336 males, which is similar to what was observed in lab males. It was also observed that the total  
337 amount of sugar and glycogen in wild males was much higher in comparison to lab males, which  
338 showed larger lipid reserves. All these results showed that removal of gut bacteria (mainly  
339 Enterobacteria) at the adult stage was not strongly connected to changes in the nutritional status  
340 or mating competitiveness in wild males. This could be the result from at least three different



341 reasons. First, wild males and bacteria could establish an association more similar to a  
342 commensalism than to a mutualistic one, being bacteria the only organisms obtaining a benefit, at  
343 least when mating is considered. Second, wild flies used in this study had developed in guavas (a  
344 primary host for *A. fraterculus*) where the pupal weight is higher than in alternative hosts, such as  
345 peach or plum [46]. Guava fruit could provide exceptional nutrients that allow males to reduce  
346 the impact of unfavorable conditions, such as the removal of the intestinal microflora. Third, wild  
347 flies were provided with an artificial adult diet, which could represent a huge shift compared to  
348 natural food sources. This change in environmental and nutritional conditions, associated to the  
349 adaptation of wild individuals to artificial rearing conditions, could have produced instability in  
350 the microflora constitution and/or a physiological impact on males, adding further complexity  
351 and even diluting the contribution of bacteria.

352       Regarding males' ability to endure starvation, we found that the effect of AB depended on  
353 the type of diet as well as the origin of the males. First, the starvation resistance of S fed males  
354 was higher (i.e., lived longer) than S+P fed males, regardless of the addition of AB and the origin  
355 of the flies. Similar results were also observed in previous works [61, 64, 68, 76] where adding  
356 protein in the diet (although it increased the sexual performance of males), negatively affected  
357 their ability to endure starvation [61]. Second, AB had contrasting results for wild and lab males.  
358 While for S fed wild males the presence of bacteria gave males a significant advantage over  
359 males fed with AB, the addition of AB allows S fed lab males to significantly live longer than  
360 males that were not treated with AB. Ben-Yosef et al. [20] also showed that AB treatment  
361 positively affects the longevity of males and females fed on sugar. As mentioned before,  
362 nutritionally stressed lab males without their gut bacteria (i.e., S+AB males) were found to  
363 perform significantly less sexual signaling than S males (and therefore did not spend great  
364 amounts of energy), which may have leave them in better nutritional conditions to endure

365 starvation. Alternatively, the addition of AB could have removed pathogenic bacteria which  
366 could be more widespread in laboratory due to the rearing conditions [39]. For example, Behar et  
367 al. [22] found that inoculation of sugar diet with *Pseudomonas aeruginosa* reduced the longevity  
368 in *C. capitata*.

369

## 370 **Conclusions**

371 In summary, following an indirect approach (AB treatment) potential contributions of the gut  
372 bacteria associated to *A. fraterculus* males was found. These contributions to the fitness of  
373 the male were more evident for laboratory flies fed on sugar and protein. This could be  
374 mediated by a combination of higher protein reserves and bacteria presence in S+P diets,  
375 which leads to a greater male competitiveness; whereas the absence of protein and presence  
376 of bacteria in S diets does not improve nutritional reserves but increases the rate of sexual  
377 displays, the amount of pheromone emitted and enhances the sexual success of the males.  
378 Thus, the evidence suggests that gut microbiota includes beneficial bacterial species that are  
379 able to exert a positive contribution. Removal of bacteria had nonetheless a positive effect on  
380 starvation resistance in sugar fed lab males, which probably points out to the presence of  
381 pathogenic strains in the rearing or the inability of sugar fed to cope with the energetic  
382 demand associated to reproduction, or both. Our results have important implications for the  
383 development and effectiveness of SIT for *A. fraterculus* although the role of gut bacteria  
384 should be confirmed following a more direct approach (i.e., the addition of specific bacterial  
385 strains to the diet). Likewise, the characterization of the gut bacterial community associated  
386 to females and its potential impact throughout the life cycle should be further addressed.

## 387 **Materials and methods**

### 388 **Biological material and holding conditions**

389 Experiments were carried out with wild and laboratory-reared *A. fraterculus* flies of the  
390 Brazilian-1 morphotype. Wild pupae were recovered from infested guavas (*Psidium guajava* L.)  
391 collected at Horco Molle, Tucumán, Argentina. Laboratory flies were obtained from the colony  
392 held at INTA Castelar. Rearing followed standard procedures [77, 78] using an artificial diet  
393 based on yeast, wheat germ, sugar, and agar for larvae [79] and a mixture of sugar and  
394 hydrolyzed yeast (MP-Biomedical®, Santa Ana, California, USA) (3:1 ratio) for adults. Rearing  
395 was carried out under controlled environmental conditions (T:  $25 \pm 2^\circ\text{C}$ , RH:  $70 \pm 10\%$ ,  
396 photoperiod 14L: 10D) until adult emergence.

### 397 **Diets and antibiotics**

398 Males from the two origins (wild or lab) were provided with one of two different diets: sugar (S)  
399 or sugar + hydrolyzed yeast (S+P), which in turn could have been supplemented or not with  
400 antibiotics (AB). This procedure resulted in four treatments: 1) S; 2) S+AB; 3) S+P; 4) S+P+AB.  
401 The S+P diet consisted of 3:1 mixture of sugar and hydrolyzed yeast, which constitutes a rich  
402 source of peptides, amino acids, vitamins and minerals, in addition to carbohydrates [5] and is  
403 comparable with artificial diets that provide the flies with all their nutritional needs [19, 20, 80].  
404 Because we aimed at comparing the impact of AB between males that had access to protein  
405 sources and males that were deprived of protein, S diet was supplemented with NaCl, MgSO<sub>4</sub>,  
406 H<sub>3</sub>BO<sub>3</sub> and a complex of vitamins (A, D, B1, B2, B3, B5, B6, B9, B12, C) and minerals (FeSO<sub>4</sub>,  
407 Ca<sub>3</sub>(PO<sub>4</sub>)<sub>2</sub>, CuSO<sub>4</sub>, Ca(IO<sub>3</sub>)<sub>2</sub>·6H<sub>2</sub>O, CoSO<sub>4</sub>, MnSO<sub>4</sub>, MgSO<sub>4</sub>·7H<sub>2</sub>O, ZnSO<sub>4</sub>, Mo, K<sub>2</sub>SO<sub>4</sub>)  
408 (DAYAMINERAL, Laboratorios Abbot, Buenos Aires, Argentina). This way, S and S+P diets  
409 were as similar as possible in terms of micronutrient content. AB treatment consisted of

410 Ciprofloxacin ( $10\mu\text{g mL}^{-1}$ ) and Piperaciline ( $200\ \mu\text{g mL}^{-1}$ ), which proved to be the most potent  
411 antibiotic combination for the inhibition of bacterial growth in *C. capitata* [19]. The different  
412 components of each diet were mixed with distilled water to form a liquid diet. For most  
413 experiments, the diet solution was applied to a piece of filter paper and placed inside the cages,  
414 and replaced every 48 h. Only when consumption was evaluated (see below), the diets were  
415 placed in a container (the lid of a 2 ml Eppendorf vial) and left inside the cage. The diets were  
416 colored with a food dye (FLEIBOR, Laboratorios Fleibor, Buenos Aires, Argentina) to allow the  
417 differentiation between those males that had been fed with AB and those that had not. This  
418 marking system does not present any detrimental effect on *A. fraterculus* [48, 81].

#### 419 **Intake of antibiotic supplemented diets and its effect on gut bacteria diversity**

##### 420 *Diet consumption*

421 To evaluate whether the presence of antibiotic affected the rate of food consumption, males were  
422 offered either S and S+AB diets, or S+P and S+P+AB diets in a dual choice experiment. For each  
423 male origin and type of diet, three replicates were evaluated. In each replicate, 20 recently  
424 emerged males (< 24-h old) were confined in a 1 L plastic container and provided with diets as a  
425 solution ( $500\ \mu\text{l}$  of initial volume –  $V_0$ ) placed in two different vials. Diet consumption was  
426 determined every 48 h by removing the vials containing diet and measuring the remaining  
427 volume of diet ( $V_r$ ) with a Hamilton syringe. For each recording, the volume consumed ( $V_c$ ) was  
428 calculated as:  $V_0 - V_r + V_e$  (the volume of diet lost due to evaporation).  $V_e$  was estimated from  
429 control vials which contained the different diets but no flies. Every time a vial was removed for  
430 measuring  $V_r$ , a new vial with  $500\ \mu\text{l}$  of diet was placed in the cage. The number of flies that  
431 remained alive at each recording was used to estimate individual consumption ( $V_{ci}$ ) during the  
432 48 h time interval in which the vial was exposed ( $V_{ci} = V_c/\text{number of individuals alive in the}$

433 cage). The experiment lasted 18 days, and the  $V_{ci}$  from subsequent 48 h periods were added to  
434 obtain the total individual consumption ( $V_{ti}$ ).

#### 435 *Molecular characterization of gut bacteria*

436 Ten-day-old virgin males from each origin, type of food and treatment were washed 3 times in  
437 ethanol 70% and their guts were dissected. Total DNA from single fly guts was extracted  
438 following Baruffi et al. [82] protocol with some modifications of volume due to the size of the  
439 tissue under study (gut of individual fly), and used as template to amplify the V6-V9 variable  
440 region of the bacterial 16S *rRNA* gene by PCR and posterior DGGE fingerprinting, using the  
441 primers 968F-GCclamp / 1408R [83].

442 DGGE was conducted using a Dcode™ system (Bio-Rad) and performed in 6%  
443 polyacrylamide gels, containing 37.5:1 acrylamide:bisacrylamide and a denaturing gradient of  
444 35:70% and 40:60% of urea. The gels were stained for 30 min in 1X TAE buffer containing  
445 ethidium bromide and visualized in a UV trans-illuminator. DGGE marker was prepared from a  
446 selection of bacterial 16S *rRNA* gene products to enable gel to gel comparison. For the  
447 identification and subsequent characterization of DGGE bands, a selection of bands was made  
448 according to their position in the electrophoretic profiles. This selection included bands that were  
449 shared between individuals (located at the same position in different lanes) and some others that  
450 were exclusively present in one individual (differentially located), in order to get a representative  
451 sampling of all bands in the DGGE profile. DGGE fragments of interest were numbered and  
452 excised with sterile razor blades immediately after staining and visualization of the gels. Gel  
453 bands were stored in 50  $\mu$ l distilled water at  $-20^{\circ}\text{C}$  and eluted at  $4^{\circ}\text{C}$  overnight before PCR  
454 reaction. DNA was reamplified using the PCR-DGGE primers without the clamp, and product  
455 integrity was checked by agarose gel electrophoresis. The PCR products were purified using the

456 QIAGEN PCR purification kit (Qiagen Ltd, Hilden, Germany) and directly sequenced with 968F  
457 primer.

458 V6-V9 (approximately 440 bases) 16S *rRNA* gene sequences obtained from DGGE bands  
459 were aligned using BioEdit [84] and Clustalw [85]. Sequence similarity searches were performed  
460 using the online sequence analysis resources BLASTN [86] of the NCBI (nt database) and  
461 Seqmatch provided by the Ribosomal Database Project (RDP) [87]. Alignment of our sequences  
462 and the closest related taxa was carried out using the MEGA 6.06 software package. A  
463 phylogenetic tree based on distance matrix method was constructed. Evolutionary distances were  
464 calculated using the method of Jukes and Cantor [88] and topology was inferred using the  
465 “neighbor-joining” method based on bootstrap analysis of 1,000 trees. Phylogenetic tree  
466 calculated by maximum parsimony using the PAUP phylogenetic package was also generated.

467 Nucleotide sequences generated from 16S *rRNA* gene corresponding to *A. fraterculus* gut  
468 bacteria, and obtained from DDGE purified bands, were submitted to GenBank  
469 (<https://www.ncbi.nlm.nih.gov/genbank/index.html>). The samples were named as follows: 1  
470 S+P+AB Wild; 10 S+P+AB Wild; 4 S+P Wild; 5 S+P Wild; 6 S+P Wild; 5 S+AB Wild; 3 S  
471 Wild; 1 S+P+AB Lab; 2 S+P+AB Lab; 5 S+P Lab; 3 S+P Lab; 4 S+P Lab; 4 S+AB Lab and 5 S  
472 Lab. The corresponding accession numbers are: MH250014-27, respectively.

### 473 **Impact of antibiotics on reproductive parameters**

#### 474 *Males' mating competitiveness*

475 To evaluate males' mating competitiveness, one wild sexually-mature virgin female (14 days-  
476 old) was released inside a mating arena (a 1 L plastic container), which contained two males from  
477 the same origin as well as diet, but only one had received AB. Males were fed on the diets from

478 emergence until sexual maturity (14 days-old), time at which they were tested. After the female  
479 was released in the arena, the occurrence of mating was followed by an observer. The type of  
480 male, the copula start time and the time at which flies disengaged were recorded. The experiment  
481 was conducted under laboratory conditions (T:  $25 \pm 1^\circ\text{C}$  and  $70 \pm 10\%$  RH) from 8:00 to 11:00  
482 am. The experiment was replicated on different days as follows: five days for wild males (both S  
483 and S+P diets), three days for S fed lab males and four days for S+P fed lab males. We evaluated  
484 667 mating arenas: 191 for S fed wild males and 171 for S+P fed wild males, 145 for S fed lab  
485 males, 160 for S+P fed lab males.

#### 486 *Males calling behavior and chemical profile*

487 To evaluate the potential changes in male sexual signaling related to the AB treatment, males'  
488 calling behavior was recorded at the same time that male-borne volatiles were collected. Each  
489 replicate consisted of ten males from the same combination of diet and AB treatment, placed in a  
490 250 mL glass chamber (20 cm length, 4 cm in diameter) [81]. Males were 10 days-old and were  
491 kept under the aforementioned treatments until the day of the test. Eight replicates were carried  
492 out and only lab males were analyzed.

493 Behavioral recordings and collection of volatiles started at 8:30 am and lasted for 3 h  
494 [daily period of sexual activity for this *A. fraterculus* morphotype (43)]. Two components of male  
495 courtship associated with pheromone emission and dispersion were considered: wing fanning and  
496 exposure of salivary glands [43, 59, 89]. During the observation period, the number of males  
497 performing these behaviors was recorded every 30 minutes. At the same time, the volatiles  
498 emitted by the calling males were collected by blowing a purified air stream through the glass  
499 chambers. Volatiles were collected onto traps made of 30 mg of Hayesep Q adsorbant (Grace,  
500 Deerfield, IL, USA) [81]. After collection, the trapped volatile compounds were eluted with 200

501  $\mu\text{l}$  of methylene chloride and chemically analyzed using an Agilent 7890A gas chromatograph  
502 (GC) equipped with a HP-5 column (30 m  $\pm$  0.32 mm inner diameter  $\pm$  0.25  $\mu\text{m}$  film thickness;  
503 Agilent Technologies), and an Agilent 5977 mass spectrometer. The initial oven temperature was  
504 35°C and after 1 min the oven temperature was increased to 100°C at 5 °C min<sup>-1</sup> and from 100°C  
505 to 230°C at 12°C min<sup>-1</sup>, then held for 10 min. Samples were injected in the splitless mode with  
506 the injector purged at 30 s with helium as the carrier gas at 27.6 cm/sec flow velocity. Methyl  
507 nonadecanoate (5 ng per 1  $\mu\text{l}$  of methylene chloride) was used as internal standard. The  
508 compounds were identified by using their relative retention times and comparison of their mass  
509 spectra with libraries. The identity of specific compounds (e.g., limonene, suspensolide, (E,E)- $\alpha$ -  
510 farnesene, anastrephin and epianastrephin) was also confirmed with standards.

511 In order to analyze the effect of AB on the chemical profile of the cuticle, after the  
512 pheromone sampling ended males were gently removed from the glass chambers and washed (in  
513 groups of ten) with 1 ml of hexane for 1 min in 2 ml glass vials. Methyl nonadecanoate (5 ng per  
514 1  $\mu\text{l}$  of hexane) was used as internal standard. Compounds were identified as described above.

## 515 **Impact of antibiotics on starvation resistance and nutritional status**

### 516 *Starvation resistance*

517 To evaluate the effect of antibiotics on males' ability to endure starvation, a group of 20 wild or  
518 lab males (< 24-h old) was caged in a 1 L plastic container and fed one of the aforementioned  
519 diets. Food was replaced every 48 h. After 10 days, food was removed and only water was  
520 provided. Every 24 h, the number of dead males was recorded until all individuals had died. For  
521 each origin and treatment, the experiment was replicated three times.



## 522 *Dry weight and nutritional reserves*

523 To evaluate the effect of AB on males' dry weight and nutritional reserves, groups of 20 wild or  
524 lab males (< 24-h old) were placed in 1 L plastic containers and provided with one of the  
525 aforementioned diets (i.e., S; S+AB; S+P; S+P+AB). Six cages were arranged per diet and origin.  
526 Diet was replaced every 48 h. After 14 days, males were removed from the cage and preserved at  
527 -20°C. A sample of 10 individuals from each cage was dried out in an oven at 50°C for 5 h and  
528 weighed in a precision scale (readability: 0.0001 g) (Ohaus Corporation, Parsippany, NJ, USA).  
529 Nutritional reserves were determined following standard biochemical techniques. Protein content  
530 was determined with the Bradford [90] method using Coomassie brilliant blue G-250 reagent.  
531 Lipid and carbohydrate contents were determined with the Van Handel [91] method. Total sugar  
532 and glycogen contents were measured with anthrone reagent [92] whereas vanillin reagent was  
533 used for lipid measurement [93].

## 534 **Statistical Analysis**

535 Data were analyzed using InfoStat and R software [94, 95].

536 To determine whether the presence of AB in the diet affected diet consumption, a mixed  
537 effect model analysis for each combination of diet and origin was performed with AB treatment  
538 as the fixed factor and the cage from which the flies were taken as the random factor.

539 To evaluate the AB effect on the percentage of copula achieved by treated and non-  
540 treated males, we performed a mixed effect model analysis with AB treatment as the fixed factor  
541 and the day of the experiment as the random factor. After verifying lack of heteroscedasticity, the  
542 data were analyzed without transformation. For wild males fed on the S diet, two experimental  
543 days (replicates) were removed due to the low number of copulations recorded (less than 10  
544 matings). Latency was analyzed by Mann-Whitney test for each category (male origin and diet

545 regimen) separately. Copula duration was analyzed with a mixed effect model where the fixed  
546 factor was the AB treatment and the random factor was the day of the experiment.

547         The mean number of males exposing their salivary gland or fanning their wings across the  
548 observation period was compared between S and S+AB, or S+P and S+P+AB, by means of  
549 Student's *t*-tests. The abundances of volatile and cuticle compounds were obtained by computing  
550 the ratio between the area under the peak of each compound and the area under the peak of the  
551 internal standard. Then, the abundance of each compound was compared between AB treated and  
552 non-treated males (separately for S and S+P males) in two ways. First, a Student's *t*-test was  
553 performed for each single compound detected by the mass detector. Second, a new Student's *t*-  
554 test was performed by building a new variable that resulted from adding those compounds that  
555 showed evidence of electroantennal activity in *A. fraterculus* females of the same laboratory  
556 strain we used in this study. These compounds included: E- $\beta$ -ocimene; Z-E- $\alpha$ -farnesene; E-E- $\alpha$ -  
557 farnesene; and epianastrephin [96, 97].

558         To evaluate the effect of AB on starvation resistance, the data were analyzed using a  
559 Kaplan-Meier survival analysis for each male origin and diet combination separately. The effect  
560 of AB on males' dry weight and nutritional reserves were analyzed by means of mixed effects  
561 models in which the AB treatment was the fixed factor and the cage from which the flies were  
562 taken was the random factor.

563

## 564 **Acknowledgments**

565 Authors would like to thank Fabian Milla and Germán Crippa for supplying laboratory flies.

566 Authors are grateful to the editor and two anonymous reviewers for their constructive comments,

567 which helped us to improve the manuscript.

568

569

570 **Abbreviations**

571 AB: Antibiotic; SIT: Sterile insect technique; S: Sugar; S+P: Sugar + hydrolyzed yeast; DGGE:

572 Denaturing gradient gel electrophoresis; RDP: Ribosomal database project; UPGMA:

573 Unweighted pair-group method with arithmetic averages; GC: Gas chromatograph.

574

575 **Ethics approval**

576 Not applicable.

577

578 **Competing interests**

579 The authors declare that they have no competing interests

580

581 **Consent for publication**

582 Not applicable.

583

584 **Availability of data and materials**

585 All data generated or analyzed during this study are included in this published article (and its

586 supplementary information files).

587

588 **Funding**

589 Financial support was provided by the International Atomic Energy Agency through the Research  
590 Contract N°17041 to DFS, the Agencia Nacional de Promoción Científica y Tecnológica  
591 (Argentina) through the project Foncyt-PICT 2013-0054 to DFS and CONICET through the  
592 project PIP 2014-2016/001co to DFS.

593

594 **Author contributions**

595 MLJ, MJR, LG and MTV performed the diet consumption, mating competitiveness, dry weight,  
596 nutritional reserves and starvation resistance tests. LEP and SBL conducted the molecular  
597 analysis. DFS, GEB and PCF carried out the calling behavior, and volatile and cuticle  
598 compounds analyses. PMP and FC performed the nutritional reserves analyses. DFS, SBL, KB,  
599 JLC and MTV conceived the project and coordinated the activities. MLJ, LEP, SBL, PCF, JLC,  
600 KB, MTV and DFS wrote the paper. All authors interpreted the results and commented on the  
601 manuscript. All authors read and approved the final manuscript

602

603

## 604 **References**

- 605 1. Bourtzis K, Miller TA. Insect symbiosis. CRC Press. Bacon Raton, FL; 2003. p. 368.
- 606 2. Yuval B, Ben-Ami E, Behar A, Ben-Yosef M, Jurkevitch E. The Mediterranean fruit fly  
607 and its bacteria–potential for improving sterile insect technique operations. *J. Appl.*  
608 *Entomol.* 2013;137:39-42.
- 609 3. Engel P, Moran NA. The gut microbiota of insects–diversity in structure and function.  
610 *FEMS Microbiol. Rev.* 2013;37:699–735.
- 611 4. Dillon RJ, Dillon VM. The gut bacteria of insects: nonpathogenic interactions. *Annu.*  
612 *Rev. Entomol.* 2004;49:71–92.
- 613 5. Ben-Yosef M, Aharon Y, Jurkevitch E, Yuval B. Give us the tools and we will do the job:  
614 symbiotic bacteria affect olive fly fitness in a diet dependent fashion. *Proc R Soc Lond B*  
615 *Biol Sci.* 2010;277: 1545–1552.
- 616 6. Feldhaar H. Bacterial symbionts as mediators of ecologically important traits of insect  
617 hosts. *Ecol. Entomol.* 2011;36:533–43.
- 618 7. Schneider DS, Chambers MC. Microbiology. Rogue insect immunity. *Science.*  
619 2008;322:1199-1200.
- 620 8. Brownlie JC, Johnson KN. Symbiont-mediated protection in insect hosts. *Trends*  
621 *Microbiol.* 2009;17:348-54.
- 622 9. Dillon RJ, Vennard CT, Charnley AK. A note: Gut bacteria produce components of a  
623 locust cohesion pheromone. *J. Appl. Microbiol.* 2002;92:759–63.
- 624 10. Augustinos AA, Kyritsis GA, Papadopoulos NT, Abd-Alla AMM, Cáceres C, Bourtzis K.  
625 Exploitation of the Medfly Gut Microbiota for the Enhancement of Sterile Insect  
626 Technique: Use of *Enterobacter* sp. in Larval Diet-Based Probiotic Applications. *PLoS*  
627 *ONE.* 2015;10: e0136459. doi:10.1371/journal.pone.0136459.

- 628 11. Broderick NA, Raffa KF, Goodman RM, Handelsman J. Census of the bacterial  
629 community of the gypsy moth larval midgut by using culturing and culture-independent  
630 methods. *Appl. Environ. Microbiol.* 2004;70:293-300.
- 631 12. Behar A, Yuval B, Jurkevitch E. Enterobacteria mediated nitrogen fixation in natural  
632 populations of the fruit fly *Ceratitis capitata*. *Mol. Ecol.* 2005;14:2637–43.
- 633 13. Behar A, Yuval B, Jurkevitch E. Community structure of the mediterranean fruit fly  
634 microbiota: seasonal and spatial sources of variation. *Isr. J. Ecol. Evol.* 2008a;53:181–91.
- 635 14. Behar A, Jurkevitch E, Yuval B. Bringing back the fruit into fruit fly-bacteria  
636 interactions. *Mol. Ecol.* 2008b;17:1375–86.
- 637 15. Corby-Harris V, Pontaroli AC, Shimkets LJ, Bennetzen JL, Habel KE, Promislow DE.  
638 Geographical distribution and diversity of bacteria associated with natural populations of  
639 *Drosophila melanogaster*. *Appl. Environ. Microbiol.* 2007;73:3470-79.
- 640 16. Anand AAP, Vennison SJ, Sankar SG, Prabhu DIG, Vasani PT, Raghuraman T, Geoffrey  
641 CJ, Vendan SE. Isolation and characterization of bacteria from the gut of *Bombyx mori*  
642 that degrade cellulose, xylan, pectin and starch and their impact on digestion. *J. Insect*  
643 *Sci.* 2010; 10:107 available online: [insectscience.org/10.107](http://insectscience.org/10.107).
- 644 17. Gupta AK, Nayduch D, Verma P, Shah B, Ghate HV, Patole MS, Shouche YS.  
645 Phylogenetic characterization of bacteria in the gut of house flies (*Musca domestica* L.).  
646 *FEMS Microbiol. Ecol.* 2012;79:581-93.
- 647 18. Kuechler SM, Renz P, Dettner K, Kehl S. Diversity of symbiotic organs and bacterial  
648 endosymbionts of lygaeoid bugs of the families Blissidae and Lygaeidae (Hemiptera:  
649 Heteroptera: Lygaeoidea). *Appl Environ Microbiol.* 2012;78:2648-59.

- 650 19. Ben-Yosef M, Jurkevitch E, Yuval B. Effect of bacteria on nutritional status and  
651 reproductive success of the Mediterranean fruit fly *Ceratitis capitata*. *Physiol. Entomol.*  
652 2008a;33:145–54.
- 653 20. Ben-Yosef M, Behar A, Jurkevitch E, Yuval B. Bacteria-diet interactions affect longevity  
654 in the medfly– *Ceratitis capitata*. *J. Appl. Entomol.* 2008b;132:690–94.
- 655 21. Ben-Yosef M, Pasternak Z, Jurkevitch E, Yuval B. Symbiotic bacteria enable olive flies  
656 (*Bactrocera oleae*) to exploit intractable sources of nitrogen. *J. Evol. Biol.* 2014;27:2695-  
657 2705.
- 658 22. Behar A, Yuval B, Jurkevitch E. Gut bacterial communities in the Mediterranean fruit fly  
659 (*Ceratitis capitata*) and their impact on host longevity. *J. Insect Physiol.* 2008c;54:1377-  
660 1383.
- 661 23. Dimou I, Rempoulakis P, Economopoulos AP. Olive fruit fly [*Bactrocera (Dacus) oleae*  
662 (*Gmelin*) (Diptera: Tephritidae)] adult rearing diet without antibiotic. *J. Appl. Entomol.*  
663 2010;134: 72–79.
- 664 24. Evans JD, Lopez DL. Bacterial probiotics induce an immune response in the honey bee  
665 (Hymenoptera: Apidae). *J. Econ. Entomol.* 2004; 97: 752-56.
- 666 25. Niyazi N, Lauzon CR, Shelly TE. Effect of probiotic adult diets on fitness components of  
667 sterile male Mediterranean fruit flies (Diptera: Tephritidae) under laboratory and field  
668 cage conditions. *J. Econ. Entomol.* 2004;97:1570-80.
- 669 26. Kazimierczak-Baryczko M, Szymaś B. Improvement of the composition of pollen  
670 substitute for honey bee (*Apis mellifera* L.), through implementation of probiotic  
671 preparations. *J. Apic. Sci.* 2006;15:50-1.

- 672 27. Gavriel S, Jurkevitch E, Gazit Y, Yuval B. Bacterially enriched diet improves sexual  
673 performance of sterile male Mediterranean fruit flies. *J. Appl. Entomol.* 2011;135:564–  
674 73.
- 675 28. Pătruică S, Mot D. The effect of using prebiotic and probiotic products on intestinal  
676 micro-flora of the honeybee (*Apis mellifera carpatica*). *Bull. Entomol.*  
677 *Res.* 2012;102:619-23.
- 678 29. Sacchetti P, Ghiardi B, Granchiotti A, Stefanini FM, Belcari A. Development of probiotic  
679 diets for the olive fly: evaluation of their effects on fly longevity and fecundity. *Ann.*  
680 *Appl. Biol.* 2014;164:138-50.
- 681 30. Hamden H, Guerfali MMS, Fadhl S, Saidi M, Chevrier C. Fitness improvement of mass-  
682 reared sterile males of *Ceratitis capitata* (Vienna 8 strain) (Diptera: Tephritidae) after gut  
683 enrichment with probiotics. *J. Econ. Entomol.* 2013;106:641-647.
- 684 31. Kyritsis GA, Augustinos AA, Cáceres C, Bourtzis K. Medfly gut microbiota and  
685 enhancement of the sterile insect technique: similarities and differences of *Klebsiella*  
686 *oxytoca* and *Enterobacter* sp. AA26 probiotics during the larval and adult stages of the  
687 VIENNA<sup>8D53</sup>+ genetic sexing strain. *Front. Microbiol.* 2017;8:2064. doi:  
688 10.3389/fmicb.2017.02064.
- 689 32. Knipling GF. Possibilities of insect control of eradication through the use of sexually  
690 sterile males. *J. Econ. Entomol.* 1955; 48:459–62.
- 691 33. Hendrichs J, Vreysen MJB, Enkerlin WR, Cayol JP. Strategic options in using sterile  
692 insect technique for area-wide integrated pest management. In: Dyck VA, Hendrichs J,  
693 Robinson AS, editors. *Sterile Insect Technique*. Springer (Dordrecht, The Netherlands);  
694 2007. p. 563-600.



- 695 34. Drew RAI, Lloyd AC. Relationship of fruit flies (Diptera: Tephritidae) and their bacteria  
696 to host plants. *Ann. Entomol. Soc. Am.* 1987;80:629–36.
- 697 35. Marchini D, Rosetto M, Dallai R, Marri L. Bacteria associated with the oesophageal bulb  
698 of the medfly *Ceratitis capitata* (Diptera: Tephritidae). *Curr. Microbiol.* 2002;44:120-24.
- 699 36. Capuzzo C, Firrao G, Mazzon L, Squartini A, Girolami V. ‘Candidatus *Erwinia dacicola*’,  
700 a coevolved symbiotic bacterium of the olive fly *Bactrocera oleae* (Gmelin). *Int. J. Syst.*  
701 *Evol. Microbiol.* 2005;55:1641-1647.
- 702 37. Estes AM, Hearn DJ, Burrack HJ, Rempoulakis P, Pierson EA. Prevalence of *Candidatus*  
703 *Erwinia dacicola* in wild and laboratory olive fruit fly populations and across  
704 developmental stages. *Environ. Entomol.* 2012;41:265-274.
- 705 38. Kounatidis I, Crotti E, Sapountzis P, Sacchi L, Rizzi A, Chouaia B, Bandi C, Alma A,  
706 Daffonchio D, Mavragani-Tsipidou P, Bourtzis K. *Acetobacter tropicalis* is a major  
707 symbiont of the olive fruit fly (*Bactrocera oleae*). *Appl. Environ.*  
708 *Microbiol.* 2009;75:3281-3288.
- 709 39. Ben-Ami E, Yuval B, Jurkevitch E. Manipulation of the microbiota of mass-reared  
710 Mediterranean fruit flies *Ceratitis capitata* (Diptera: Tephritidae) improves sterile male  
711 sexual performance. *ISME J.* 2010;4:28–37.
- 712 40. Malavasi A, Rohwer GG, Campbell DS. Fruit fly free areas: strategies to develop them.  
713 In: Calkins KCO, Klassen W, Liedo P, editors. *Fruit flies and the sterile insect technique.*  
714 CRC Press, Boca Raton, Fla; 1994. p. 165-180.
- 715 41. Guillén D, Sánchez R. Expansion of the national fruit fly control programme in  
716 Argentina. In: Vreysen MJB, Robinson AS, Hendrichs J, editors. *Area-Wide Control of*  
717 *Insect Pests. From Research to Field Implementation.* 2007. p. 653-660.

- 718 42. Vera MT, Ruiz MJ, Oviedo A, Abraham S, Mendoza M, Segura DF, Kouloussis NA,  
719 Willink E. Fruit compounds affect male sexual success in the South American fruit fly,  
720 *Anastrepha fraterculus* (Diptera: Tephritidae). J. Appl. Entomol. 2013;137:2-10.
- 721 43. Segura DF, Petit-Marty N, Sciurano R, Vera MT, Calcagno G, Allinghi A, Gómez Cendra  
722 P, Cladera J, Vilardi J. Lekking behavior of *Anastrepha fraterculus* (Diptera:  
723 Tephritidae). Fla. Entomol. 2007;90:154-62.
- 724 44. Segura DF, Utgés ME, Liendo MC, Rodríguez MF, Devescovi F, Vera MT, Teal PEA,  
725 Cladera JL. Methoprene treatment reduces the pre-copulatory period in *Anastrepha*  
726 *fraterculus* (Diptera: Tephritidae) sterile males. J. Appl. Entomol. 2013;137:19-29.
- 727 45. Abraham S, Goane L, Cladera J, Vera MT. Effects of male nutrition on sperm storage and  
728 remating behavior in wild and laboratory *Anastrepha fraterculus* (Diptera: Tephritidae)  
729 females. J. Insect Physiol. 2011;57:1501-09.
- 730 46. Liendo MC, Devescovi F, Bachmann GE, Utgés ME, Abraham S, Vera MT,  
731 Lanzavecchia SB, Bouvet JP, Gómez-Cendra P, Hendrichs J, Teal PEA, Cladera JL,  
732 Segura DF. Precocious sexual signalling and mating in *Anastrepha fraterculus* (Diptera:  
733 Tephritidae) sterile males achieved through juvenile hormone treatment and protein  
734 supplements. Bull. Entomol. Res. 2013;103:1–13. doi: 10.1017/S0007485312000442.
- 735 47. Devescovi F, Abraham S, Passos Roriz AK, Nolzco N, Castañeda R, Tadeo E, Caceres  
736 C, Segura DF, Vera MT, Joachim-Bravo I, Canal N, Rull J. Ongoing speciation within the  
737 *Anastrepha fraterculus* cryptic species complex: the case of the Andean morphotype.  
738 Entomol. Exp. Appl. 2014;152:238–47.
- 739 48. Juárez ML, Devescovi F, Břízová R, Bachmann G, Segura DF, Kalinová B, Fernández P,  
740 Ruiz MJ, Yang J, Teal PEA, Caceres C, Vreysen MJB, Vera MT. Evaluating mating

- 741 compatibility within fruit fly cryptic species complexes and the potential role of sex  
742 pheromones in pre-mating isolation. *ZooKeys*. 2015;540:125–55.
- 743 49. Rull J, Abraham S, Kovaleski A, Segura DF, Islam A, Wornoyaporn V, Dammalage T,  
744 Santo Tomas U, Vera MT. Random Mating and Reproductive Compatibility among  
745 Argentinean and Southern Brazilian Populations of *Anastrepha fraterculus* (Diptera:  
746 Tephritidae). *Bull. Entomol. Res.* 2012;102:435-43.
- 747 50. Ballard JW, Melvin RG. Tetracycline treatment influences mitochondrial metabolism and  
748 mtDNA density two generations after treatment in *Drosophila*. *Insect Mol Biol.*  
749 2007;16:799-802.
- 750 51. Rempoulakis P, Sela S, Nemny-Lavy E, Pinto R., Birke A, Nestel D. Microbial  
751 composition affects the performance of an artificial Tephritid larval diet. *Bull. Entomol.*  
752 *Res.* 2017:1-8.
- 753 52. Jurkevitch E. Riding the Trojan horse: combating pest insects with their own symbionts.  
754 *Microb. Biotechnol.* 2011;4:620-27.
- 755 53. Lauzon CR, Sjogren RE, Prokopy RJ. Enzymatic capabilities of bacteria associated with  
756 apple maggot flies: a postulated role in attraction. *J. Chem. Ecol.* 2000;26: 953-67.
- 757 54. Drew RAI, Yuval B. The evolution of fruit fly feeding behaviour. In: Aluja M, Norrbom  
758 AL, editors. *Fruit flies: phylogeny and evolution of behavior*, Boca Raton, FL: CRC  
759 Press, 2000. p. 731–749.
- 760 55. Silva F, Alcazar A, Macedo LLP, Oliveira AS, Macedo FP, Abreu LR, Santosa EA, Sales  
761 MP. Digestive enzymes during development of *Ceratitis capitata* (Diptera: Tephritidae)  
762 and effects of SBTI on its digestive serine proteinase targets. *Insect Biochem. Mol. Biol.*  
763 2006;36:561-69.

- 764 56. Lin X, Pan Q, Tian H, Douglas AE, Liu T. Bacteria abundance and diversity of different  
765 life stages of *Plutella xylostella* (Lepidoptera: Plutellidae), revealed by bacteria culture-  
766 dependent and PCR-DGGE methods. *Insect Science*. 2015; 22:375–385.
- 767 57. Malavasi A, Morgante JS, Prokopy RJ. Distribution and activities of *Anastrepha*  
768 *fraterculus* (Diptera: Tephritidae) flies on host and non host trees. *Ann. Entomol. Soc.*  
769 *Am.* 1983;76:286-92.
- 770 58. Aluja M, Birke A. Habitat use by adults of *Anastrepha obliqua* (Diptera: Tephritidae) in a  
771 mixed mango and tropical plum orchard. *Ann. Entomol. Soc. Am.* 1993; 86:799-812.
- 772 59. Gómez Cendra PG, Calcagno G, Belluscio L, Vilardi JC. Male courtship behavior of the  
773 South American fruit fly, *Anastrepha fraterculus*, from an Argentinean laboratory strain.  
774 *J. Insect Sci.* 2011;11:1-18.
- 775 60. Shelly TE, Robinson AS, Caceres C, Wornoayporn V, Islam A. Exposure to ginger root  
776 oil enhances mating success of male Mediterranean fruit flies (Diptera: Tephritidae) from  
777 a genetic sexing strain. *Fla. Entomol.* 2002;85:440-45.
- 778 61. Yuval B, Maor M, Levy K, Kaspi R, Taylor P, Shelly T. Breakfast of champions or kiss  
779 of death? Survival and sexual performance of protein-fed, sterile Mediterranean fruit flies  
780 (Diptera: Tephritidae). *Fla. Entomol.* 2007;90:115-22.
- 781 62. Aluja M, Jácome I, Macías-Ordóñez R. Effect of adult nutrition on male sexual  
782 performance in four neotropical fruit fly species of the genus *Anastrepha* (Diptera:  
783 Tephritidae). *J. Insect Behav.* 2001;14:759-75.
- 784 63. Yuval B, Kaspi ROY, Shloush S, Warburg MS. Nutritional reserves regulate male  
785 participation in Mediterranean fruit fly leks. *Ecol. Entomol.* 1998;23:211-15.
- 786 64. Kaspi R, Yuval B. Post-teneral protein feeding improves sexual competitiveness but

- 787 reduces longevity of mass-reared sterile male Mediterranean fruit flies (Diptera:  
788 Tephritidae). *Ann. Entomol. Soc. Am.* 2000;93:949-55.
- 789 65. Kaspi R, Taylor PW, Yuval B. Diet and size influence sexual advertisement and  
790 copulatory success of males in Mediterranean fruit fly leks. *Ecol. Entomol.* 2000;25:279-  
791 84.
- 792 66. Taylor PW, Yuval B. Postcopulatory sexual selection in Mediterranean fruit flies:  
793 advantages for large and protein-fed males. *Anim. Behav.* 1999;58:247-54.
- 794 67. Blay S, Yuval B. Nutritional correlates of reproductive success of male Mediterranean  
795 fruit flies (Diptera: Tephritidae). *Anim. Behav.* 1997;54:59-66.
- 796 68. Pereira R, Yuval B, Liedo P, Teal PEA, Shelly TE, McInnis DO, Hendrichs J. Improving  
797 sterile male performance in support of programmes integrating the sterile insect technique  
798 against fruit flies. *J. Appl. Entomol.* 2013;137:178-90.
- 799 69. Teal PE, Pereira R, Segura DF, Haq I, Gómez-Simuta Y, Robinson AS, Hendrichs J.  
800 Methoprene and protein supplements accelerate reproductive development and improve  
801 mating success of male tephritid flies. *J. Appl. Entomol.* 2013;137:91-8.
- 802 70. Epsky ND, Heath RR. Food availability and pheromone production by males of  
803 *Anastrepha suspensa* (Diptera: Tephritidae). *Environ. Entomol.* 1993;22:942-47.
- 804 71. Webb JC, Burk T, Sivinski, J. Attraction of female caribbean fruit-flies, *Anastrepha*  
805 *suspensa* (Diptera, Tephritidae), to the presence of males and males-produced stimuli in  
806 field cages. *Ann. Entomol. Soc. Am.* 1983;76:996–98. doi: 10.1093/ aesa/76.6.996.
- 807 72. Sivinski J, Burk T, Webb JC. Acoustic courtship signals in the Caribbean fruit fly,  
808 *Anastrepha suspensa* (Loew). *Anim. Behav.* 1984;32:1011–16. doi: 10.1016/S0003-  
809 3472(84)80214-6.

- 810 73. Mankin RW, Malacrida AR, Aquino C. Acoustical comparison of calling songs from  
811 *Anastrepha* species in Brazil. In: McPheron BA, Steck GJ, editors. Fruit Fly Pests: A  
812 World Assessment of Their Biology and Management; 1996. p. 37-42.
- 813 74. Mankin RW, Petersson E, Epsky ND, Heath RR, Sivinski J. Exposure to male  
814 pheromones enhances female response to male calling song in the Caribbean fruit fly,  
815 *Anastrepha suspensa* (Diptera: Tephritidae). Fla. Entomol. 2000;83:411-21.
- 816 75. Briceño RD, Hernández MR, Orozco D, Hanson P. Acoustic courtship songs in males of  
817 the fruit fly *Anastrepha ludens* (Diptera: Tephritidae) associated with geography, mass  
818 rearing and mating success. Rev. Biol. Trop. 2009;57:257–65.
- 819 76. Maor M, Kamensky B, Shloush S, Yuval B. Effects of post-teneral diet on foraging  
820 success of sterile male Mediterranean fruit flies. Entomol. Exp. Appl. 2004;110:225–30.
- 821 77. Jaldo HE, Gramajo MC, Willink E. Mass rearing of *Anastrepha fraterculus* (Diptera:  
822 Tephritidae): a preliminary strategy. Fla. Entomol. 2001;84:716–18.
- 823 78. Vera T, Abraham S, Oviedo A, Willink E. Demographic and quality control parameters of  
824 *Anastrepha fraterculus* (Diptera: Tephritidae) maintained under artificial rearing. Fla.  
825 Entomol. 2007;90:53-7.
- 826 79. Salles LAB. Bioecologia e Control das Moscas das Frutas Sul-Americanas. EMBRAPA-  
827 CPACT, Pelotas, Brazil. 1995. p. 58.
- 828 80. Chang CL, Albrecht C, El-Shall SSA, Kurashima R. Adult reproductive capacity of  
829 *Ceratitidis capitata* (Diptera: Tephritidae) on a chemically defined diet. Ann. Entomol. Soc.  
830 Am. 2001;94:702–06.
- 831 81. Bachmann GE, Segura DF, Devescovi F, Juárez ML, Ruiz MJ, Vera MT, Cladera J, Teal  
832 PEA, Fernández PC. Male Sexual Behavior and Pheromone Emission Is Enhanced by

- 833 Exposure to Guava Fruit Volatiles in *Anastrepha fraterculus*. PLoS ONE. 2015;10:  
834 e0124250. doi:10.1371/journal.pone.0124250.
- 835 82. Baruffi L, Damiani G, Guglielmino CR, Bandi C, Malacrida AR, Gasperi G.  
836 Polymorphism within and between populations of *Ceratitis capitata*: comparison  
837 between RAPD and multilocus enzyme electrophoresis data. *Heredity*. 1995;74:425-37.
- 838 83. Heuer HK, Baker M, Smalla PK, Wellington EMH. Analysis of actinomyces  
839 communities by specific amplification of genes encoding 16S *rRNA* and gel-  
840 electrophoresis separation in denaturing gradients. *Appl. Environ. Microbiol.*  
841 1997;63:3233–41.
- 842 84. Hall TA. BioEdit: a user-friendly biological sequence alignment editor and analysis  
843 program for Windows 95/98/NT. In *Nucleic acids symposium series* [London]:  
844 Information Retrieval Ltd., c1979-c2000; 1999. p. 95-98.
- 845 85. Thompson JD, Higgins DG, Gibson TJ. CLUSTAL W: improving the sensitivity of  
846 progressive multiple sequence alignment through sequence weighting, position-specific  
847 gap penalties and weight matrix choice. *Nucleic Acids Res.* 1994;22:4673-80.
- 848 86. Altschul SF, Gish W, Miller W, Myers EW, Lipman DJ. Basic local alignment search  
849 tool. *J. Mol. Biol.* 1990;215:403-10.
- 850 87. Cole JR, Chai B, Marsh TL, Farris RJ, Wang Q, Kulam SA, Chandra S, McGarrell DM,  
851 Schmidt TM, Garrity GM, Tiedje JM. The Ribosomal Database Project (RDP-II):  
852 previewing a new autoaligner that allows regular updates and the new prokaryotic  
853 taxonomy. *Nucleic Acids Res.* 2003;31:442-43.
- 854 88. Jukes TH, Cantor CR. Evolution of protein molecules. In Munro HH, editor. *Mammalian*  
855 *Protein Metabolism*. Academic Press. New York; 1969. p. 21-132.

- 856 89. Nation JL. The role of pheromones in the mating system of *Anastrepha* fruit flies. In:  
857 World Crop Pests: fruit flies, their biology, natural enemies and control. Elsevier,  
858 Amsterdam; 1989. p. 189–205.
- 859 90. Bradford MM. A rapid and sensitive method for the quantitation of microgram quantities  
860 of protein utilizing the principle of protein-dye binding. *Anal. Biochem.* 1976;72:248-54.
- 861 91. Van Handel E. Estimation of glycogen in small amounts of tissue. *Anal. Biochem.*  
862 1965;11:256-65.
- 863 92. Morris DL. Quantitative determination of carbohydrates with Dreywood's anthrone  
864 reagent. *Science.* 1948; 107:254-255.
- 865 93. Frings CS, Fendley TW, Dunn RT, Queen CA. Improved determination of total serum  
866 lipids by the sulfo-phospho-vanillin reaction. *Clin Chem.* 1972;18:673–674.
- 867 94. Di Rienzo RJ, Casanoves F, Balzarini MG, Gonzalez L, Tablada M, Robledo CW.  
868 InfoStat v. 2012. Grupo InfoStat, FCA, Universidad Nacional de Córdoba, Córdoba,  
869 Argentina. 2012.
- 870 95. R Core Team. R: A Language and Environment for Statistical Computing. R Foundation  
871 for Statistical Computing, Vienna, Austria. 2015.
- 872 96. Břízová R, Mendonça AL, Vaníčková L, Lima-Mendonça A, da Silva CE, Tomčala A,  
873 Paranhos BAJ, Dias VS, Joachim-Bravo IS, Hoskovec M, Kalinová B, do Nascimento  
874 RR. Pheromone analyses of the *Anastrepha fraterculus* (Diptera: Tephritidae) cryptic  
875 species complex. *Fla. Entomol.* 2013;96:1107–15. doi: 10.1653/024.096.0351.
- 876 97. Bachmann GE. Factores que afectan el éxito de apareamiento de machos de la Mosca  
877 Sudamericana de la Fruta, *Anastrepha fraterculus* (Diptera: Tephritidae). Tesis Doctoral,  
878 Universidad de Buenos Aires, Buenos Aires, Argentina. 2016.



879

880

881 **Figure legends**

882 **Figure 1.** Effect of antibiotics treatment on laboratory and wild *Anastrepha fraterculus* males'  
883 consumption. Individual total consumption ( $\mu$ l) of males exposed to two different diets with or  
884 without the antibiotic addition (AB): S and S+AB diets, or S+P and S+P+AB in a dual choice  
885 experiment.

886 **Figure 2.** Phylogenetic tree based on V6-V9 16S *rRNA* gene sequence analysis of *A. fraterculus*  
887 gut bacteria and the closest relative taxa. The tree is based on Neighbor-Joining method (Jukes-  
888 Cantor distance), using a 50% conservation filter. Numbers on the nodes present % bootstrap  
889 values based on 1000 replicates. Scale bar indicates 10% estimated sequence divergence. The  
890 16S *rRNA* gene sequences of *Methanogenium marinum* were arbitrarily chosen as an outgroup.

891 **Figure 3.** Effect of antibiotics treatment on laboratory and wild *Anastrepha fraterculus* male  
892 mating competitiveness. (A) Percentage of matings (B) Latency to copulate (time elapsed before  
893 copulation started) and (C) Duration of copula obtained by males fed with two different diets  
894 with or without addition of antibiotic (AB).

895 **Figure 4.** Effect of antibiotics treatment on laboratory *Anastrepha fraterculus* male calling  
896 behavior and pheromone release. (A) Number of males fed on S or S+AB and S+P or S+P+AB  
897 diets that were detected fanning their wings across the observational period. (B) Number of males  
898 fed on S or S+AB and S+P or S+P+AB diets that were detected exposing their salivary glands  
899 across the observational period.

900 **Figure 5.** Effect of antibiotics on laboratory (A) and wild (B) *Anastrepha fraterculus* males'  
901 starvation resistance. Cumulative proportion of surviving males fed on S or S+P diets with or  
902 without the addition of antibiotics (AB).

903 **Figure 6.** Effect of antibiotics on laboratory and wild *Anastrepha fraterculus* males' dry weight.  
904 Weight (mg) of males fed on S or S+AB and S+P or S+P+AB diets with or without the antibiotic  
905 addition (AB).

906 **Figure 7.** Effect of antibiotic on laboratory and wild *Anastrepha fraterculus* males' nutritional  
907 reserves. (A) Sugar, (B) Glycogen, (C) Protein and (D) Lipids content in males fed on S or S+AB  
908 and S+P or S+P+AB diets with or without the antibiotic addition (AB).



910 **Table 1.** Analysis of V6-V9 16S *rRNA* gene sequences obtained from DGGE profiles and sequencing.

911

| DGGE Band Number                                               | Taxonomic group (RDP)                                                                             | Closest related sequence (BLAST)<br>(Genbank Accession number)                                                                     | Nucleotide<br>bases<br>compared | Similarity |
|----------------------------------------------------------------|---------------------------------------------------------------------------------------------------|------------------------------------------------------------------------------------------------------------------------------------|---------------------------------|------------|
| 3 S+P Lab / 4 S+P Lab /<br>5 S+P Lab                           | Gamaproteobacteria/ Enterobacteriales/<br>Enterobacteriaceae/<br>unclassified_Enterobacteriaceae  | <i>Raoultella planticola</i> strain Ns8<br>(MG544105.1)<br><br><i>Serratia marcescens</i> subsp.<br><i>marcescens</i> (HG326223.1) | 389                             | 99%        |
| 4 S+P Wild / 5 S Lab                                           | Gamaproteobacteria/ Enterobacteriales/<br>Enterobacteriaceae/<br>unclassified_Enterobacteriaceae  | <i>Enterobacter soli</i> strain YHBG2<br>(MG516168.1)<br><br><i>Serratia marcescens</i> subsp.<br><i>marcescens</i> (MG516113.1)   | 384                             | 100%       |
| 1 S+P+AB Wild /<br>2 S+P+AB Lab                                | Gamaproteobacteria/ Xanthomonadales/<br>Xanthomonadaceae/ <i>Stenotrophomonas</i>                 | <i>Stenotrophomonas maltophilia</i><br>(MG546679.1)<br><br><i>Stenotrophomonas maltophilia</i><br>(MG546678.1)                     | 388                             | 100%       |
| 5 S+P Wild / 6 S+P Wild                                        | Gamaproteobacteria/ Enterobacteriales/<br>Enterobacteriaceae/ unclassified<br>_Enterobacteriaceae | Uncultured <i>Enterobacter</i> sp. clone 03<br>(KJ526996.1)<br><br><i>Klebsiella aerogenes</i> strain JMB006<br>(MG546216.1)       | 387                             | 99%        |
| 10 S+P+AB Wild /<br>5 S+AB Wild / 1 S+P+AB<br>Lab / 4 S+AB Lab | Alphaproteobacteria/ unclassified_Alpha-<br>proteobacteria                                        | Uncultured alpha proteobacterium<br>(HM111616.1)                                                                                   | 390                             | 99%        |
| 3 S Wild                                                       | Gamaproteobacteria/Enterobacteriales/<br>Enterobacteriaceae/Citrobacter                           | <i>Klebsiella</i> sp. M5a1 (CP020657.1)<br><i>Klebsiella oxytoca</i> strain FCX2 16S<br>(KU942497.1)                               | 387                             | 100%       |

912 **Table 2.** Relative abundances (mean  $\pm$  S.E.) of compounds detected in the volatile collection of *Anastrepha fraterculus* males fed on  
 913 S or S+P diets (N = 8). Results are shown as mean  $\pm$  SE for AB treated and non-treated males and compared by means of a Student's  
 914 *t*-test.

915

| Ret. time (min) | Compound                               | KI   | KI lit. <sup>c</sup> | Sugar fed males   |                  |      | Sugar + protein fed males |                   |      |
|-----------------|----------------------------------------|------|----------------------|-------------------|------------------|------|---------------------------|-------------------|------|
|                 |                                        |      |                      | S                 | S+AB             | p    | S+P                       | S+P+AB            | p    |
| 10.76           | limonene                               | 1027 | 1031                 | 0.06 $\pm$ 0.004  | 0.07 $\pm$ 0.004 | 0.45 | 0.19 $\pm$ 0.05           | 0.15 $\pm$ 0.005  | 0.27 |
| 10.94           | indane                                 | 1033 | 1034                 | 0                 | 0                | -    | 1.622 $\pm$ 0.36          | 1.34 $\pm$ 0.026  | 0.27 |
| 11.00           | unknown                                | 1035 | -                    | 0.01 $\pm$ 0.002  | 0.05 $\pm$ 0.031 | 0.18 | 0                         | 0                 | -    |
| 11.40           | E- $\beta$ -ocimene <sup>b</sup>       | 1049 | 1050                 | 1.84 $\pm$ 0.247  | 1.68 $\pm$ 0.215 | 0.32 | 6.554 $\pm$ 0.16          | 6.15 $\pm$ 0.098  | 0.41 |
| 14.00           | 4-Methylindane                         | 1141 | 1142                 | 0                 | 0                | -    | 3.375 $\pm$ 0.08          | 2.89 $\pm$ 0.052  | 0.30 |
| 19.90           | suspensole <sup>a</sup>                | 1496 | no data              | 0.42 $\pm$ 0.057  | 0.33 $\pm$ 0.058 | 0.16 | 0.543 $\pm$ 0.01          | 0.79 $\pm$ 0.018  | 0.15 |
| 19.92           | Z-E- $\alpha$ -farnesene <sup>b</sup>  | 1498 | 1497                 | 0.56 $\pm$ 0.012  | 0.39 $\pm$ 0.052 | 0.08 | 0.997 $\pm$ 0.03          | 1.11 $\pm$ 0.033  | 0.39 |
| 20.06           | E-E- $\alpha$ -farnesene <sup>ab</sup> | 1510 | 1508                 | 9.21 $\pm$ 1.497  | 6.04 $\pm$ 0.818 | 0.04 | 14.996 $\pm$ 0.38         | 15.71 $\pm$ 0.447 | 0.45 |
| 20.98           | anastrephin <sup>a</sup>               | 1596 | no data              | 0.31 $\pm$ 0.037  | 0.21 $\pm$ 0.038 | 0.04 | 0.571 $\pm$ 0.01          | 0.78 $\pm$ 0.025  | 0.24 |
| 21.12           | epianastrephin <sup>ab</sup>           | 1610 | 1621                 | 0.91 $\pm$ 0.128  | 0.59 $\pm$ 0.071 | 0.04 | 1.498 $\pm$ 0.03          | 2.21 $\pm$ 0.072  | 0.19 |
|                 | Sum of EAG+ compounds                  | -    | -                    | 11.93 $\pm$ 1.712 | 8.28 $\pm$ 1.09  | 0.05 | 23.106 $\pm$ 5.43         | 23.73 $\pm$ 5.641 | 0.23 |

916 a Compound identified by comparison with authentic standards.

917 b Compound that triggers a positive EAG response in female's antennae (Brizova et al. 2013; Bachmann 2016).

918 c: KI: Kovats index obtained for a DB5 / HP5 column and similar chromatographic conditions from www.pherobase.com and webbook.nist.gov.

919

920

921 **Table 3.** Relative abundances (mean  $\pm$  S.E.) of compounds detected in the cuticle extracts of *Anastrepha fraterculus* males fed on S  
 922 or S+P diets (N = 8). Results are shown as mean  $\pm$  SE for AB treated and non-treated males and compared by means of a Student's *t*-  
 923 test.

| Ret. time (min) | Compound                                  | KI   | KI lit. <sup>c</sup> | Sugar fed males   |                   |      | Sugar + protein fed males |                   |      |
|-----------------|-------------------------------------------|------|----------------------|-------------------|-------------------|------|---------------------------|-------------------|------|
|                 |                                           |      |                      | S                 | S+AB              | p    | S+P                       | S+P+AB            | p    |
| 19.90           | suspensolide <sup>a</sup>                 | 1496 | no data              | 0.11 $\pm$ 0.001  | 0.12 $\pm$ 0.002  | 0.31 | 0.07 $\pm$ 0.002          | 0.06 $\pm$ 0.001  | 0.33 |
| 20.06           | E-E- $\alpha$ -farnesene <sup>ab</sup>    | 1510 | 1508                 | 0.60 $\pm$ 0.014  | 0.44 $\pm$ 0.007  | 0.16 | 0.57 $\pm$ 0.035          | 0.91 $\pm$ 0.053  | 0.31 |
| 20.98           | anastrephin <sup>a</sup>                  | 1596 | no data              | 0.11 $\pm$ 0.002  | 0.12 $\pm$ 0.004  | 0.43 | 0.10 $\pm$ 0.006          | 0.27 $\pm$ 0.019  | 0.22 |
| 21.12           | epianastrephin <sup>ab</sup>              | 1610 | 1621                 | 0.55 $\pm$ 0.013  | 0.52 $\pm$ 0.016  | 0.44 | 0.46 $\pm$ 0.026          | 1.00 $\pm$ 0.066  | 0.25 |
| 23.79           | nonadecane*                               | 1900 | 1900                 | 0.47 $\pm$ 0.011  | 0.45 $\pm$ 0.006  | 0.43 | 0.33 $\pm$ 0.008          | 0.66 $\pm$ 0.032  | 0.18 |
| 24.46           | monounsaturated alkene (C <sub>20</sub> ) | 1981 | -                    | 0.11 $\pm$ 0.002  | 0.11 $\pm$ 0.003  | 0.47 | 0.12 $\pm$ 0.004          | 0.29 $\pm$ 0.016  | 0.18 |
| 25.23           | monounsaturated alkene (C <sub>21</sub> ) | 2079 | -                    | 1.02 $\pm$ 0.029  | 1.12 $\pm$ 0.028  | 0.40 | 0.78 $\pm$ 0.022          | 1.87 $\pm$ 0.094  | 0.16 |
| 25.28           | monounsaturated alkene (C <sub>21</sub> ) | 2084 | -                    | 14.24 $\pm$ 0.417 | 15.16 $\pm$ 0.376 | 0.44 | 19.24 $\pm$ 0.621         | 44.65 $\pm$ 2.460 | 0.18 |
| 25.44           | heneicosane <sup>a</sup>                  | 2100 | 2100                 | 20.53 $\pm$ 0.431 | 20.94 $\pm$ 0.352 | 0.48 | 10.50 $\pm$ 0.344         | 9.87 $\pm$ 0.245  | 0.45 |
| 26.23           | monounsaturated alkene (C <sub>22</sub> ) | 2180 | -                    | 0.81 $\pm$ 0.025  | 0.86 $\pm$ 0.011  | 0.44 | 0.64 $\pm$ 0.022          | 1.10 $\pm$ 0.044  | 0.20 |
| 27.32           | monounsaturated alkene (C <sub>23</sub> ) | 2274 | -                    | 1.96 $\pm$ 0.061  | 2.11 $\pm$ 0.037  | 0.42 | 0.64 $\pm$ 0.016          | 1.33 $\pm$ 0.051  | 0.13 |
| 27.40           | monounsaturated alkene (C <sub>23</sub> ) | 2280 | -                    | 22.89 $\pm$ 0.066 | 21.83 $\pm$ 0.346 | 0.44 | 18.59 $\pm$ 0.473         | 34.27 $\pm$ 1.600 | 0.20 |
| 27.64           | tricosane <sup>a</sup>                    | 2300 | 2300                 | 3.40 $\pm$ 0.582  | 3.57 $\pm$ 0.058  | 0.44 | 1.65 $\pm$ 0.047          | 1.81 $\pm$ 0.053  | 0.42 |
| 29.20           | tetracosane <sup>a</sup>                  | 2400 | 2400                 | 2.49 $\pm$ 0.029  | 2.25 $\pm$ 0.022  | 0.27 | 1.04 $\pm$ 0.023          | 0.74 $\pm$ 0.016  | 0.18 |
| 31.25           | pentacosane <sup>a</sup>                  | 2500 | 2500                 | 3.28 $\pm$ 0.058  | 3.23 $\pm$ 0.040  | 0.48 | 1.62 $\pm$ 0.038          | 1.64 $\pm$ 0.039  | 0.48 |
|                 | Sum of EAG + compounds                    | -    | -                    | 1.15 $\pm$ 0.021  | 0.96 $\pm$ 0.020  | 0.50 | 1.03 $\pm$ 0.032          | 1.91 $\pm$ 0.024  | 0.38 |

924 a Compound identified by comparison with authentic standards.

925 b Compound that triggers a positive EAG response in female's antennae (Brizova et al. 2013; Bachmann 2016).

926 c: KI: Kovats index obtained for a DB5 / HP5 column and similar chromatographic conditions from www.pherobase.com and webbook.nist.gov.

927

928

929

930

931

932

933 **Additional files**

934

935

936 Additional files 1:Figure **S1**. Alignment of V6-V9 16S *rRNA* nucleotide sequences (420 bases) obtained from DGGE profiles. Af V6-  
937 V9 Seq 1-14 correspond: Band 1 S+P+AB Wild, Band 10 S+P+AB Wild, Band 4 S+P Wild, Band 5 S+P Wild, Band 6 S+P Wild,  
938 Band 5 S+AB Wild, Band 3 S Wild, Band 1 S+P+AB Lab, Band 2 S+P+AB Lab, Band 5 S+P Lab, Band 3 S+P Lab, Band 4 S+P Lab,  
939 Band 4 S+AB Lab, Band 5 S Lab respectively (WORD 51.5 KB).

940

941

942



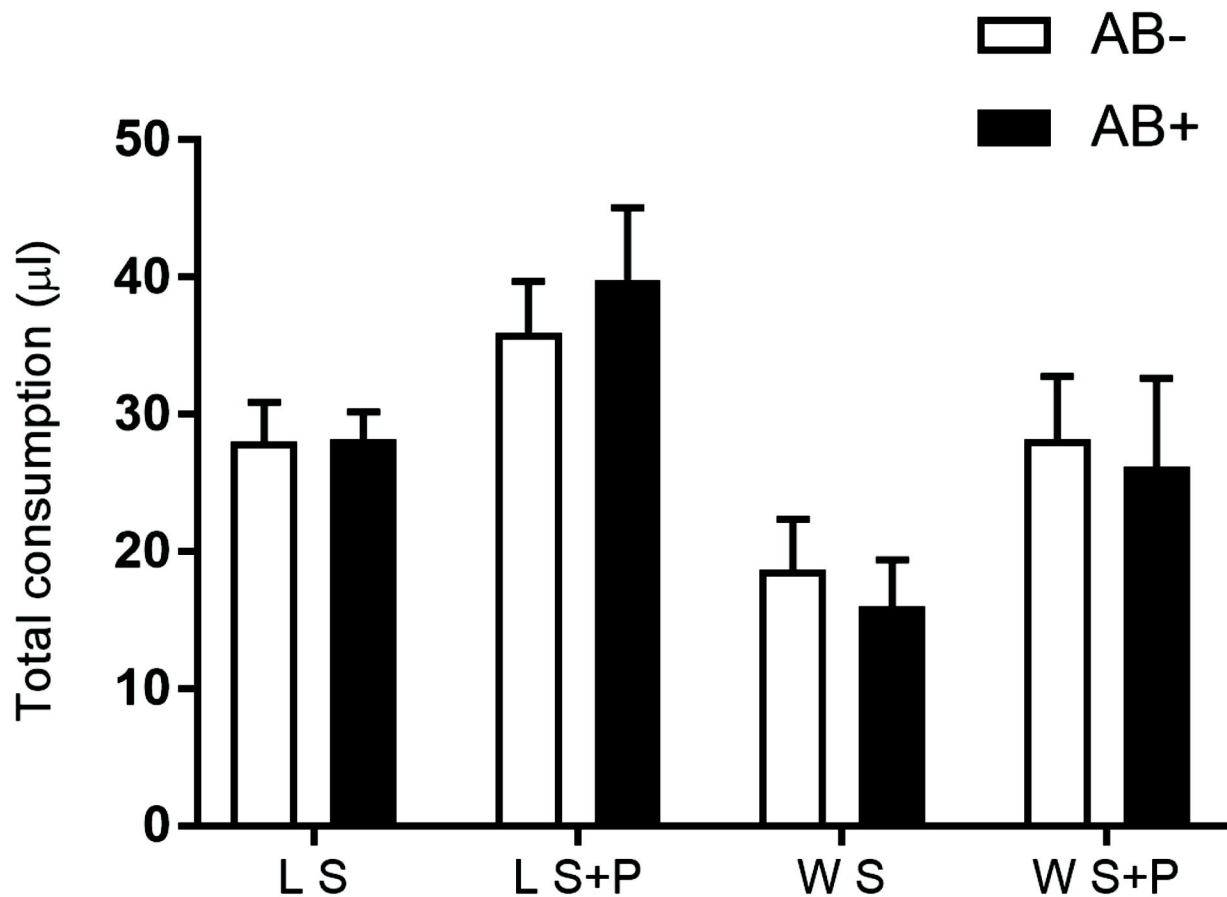

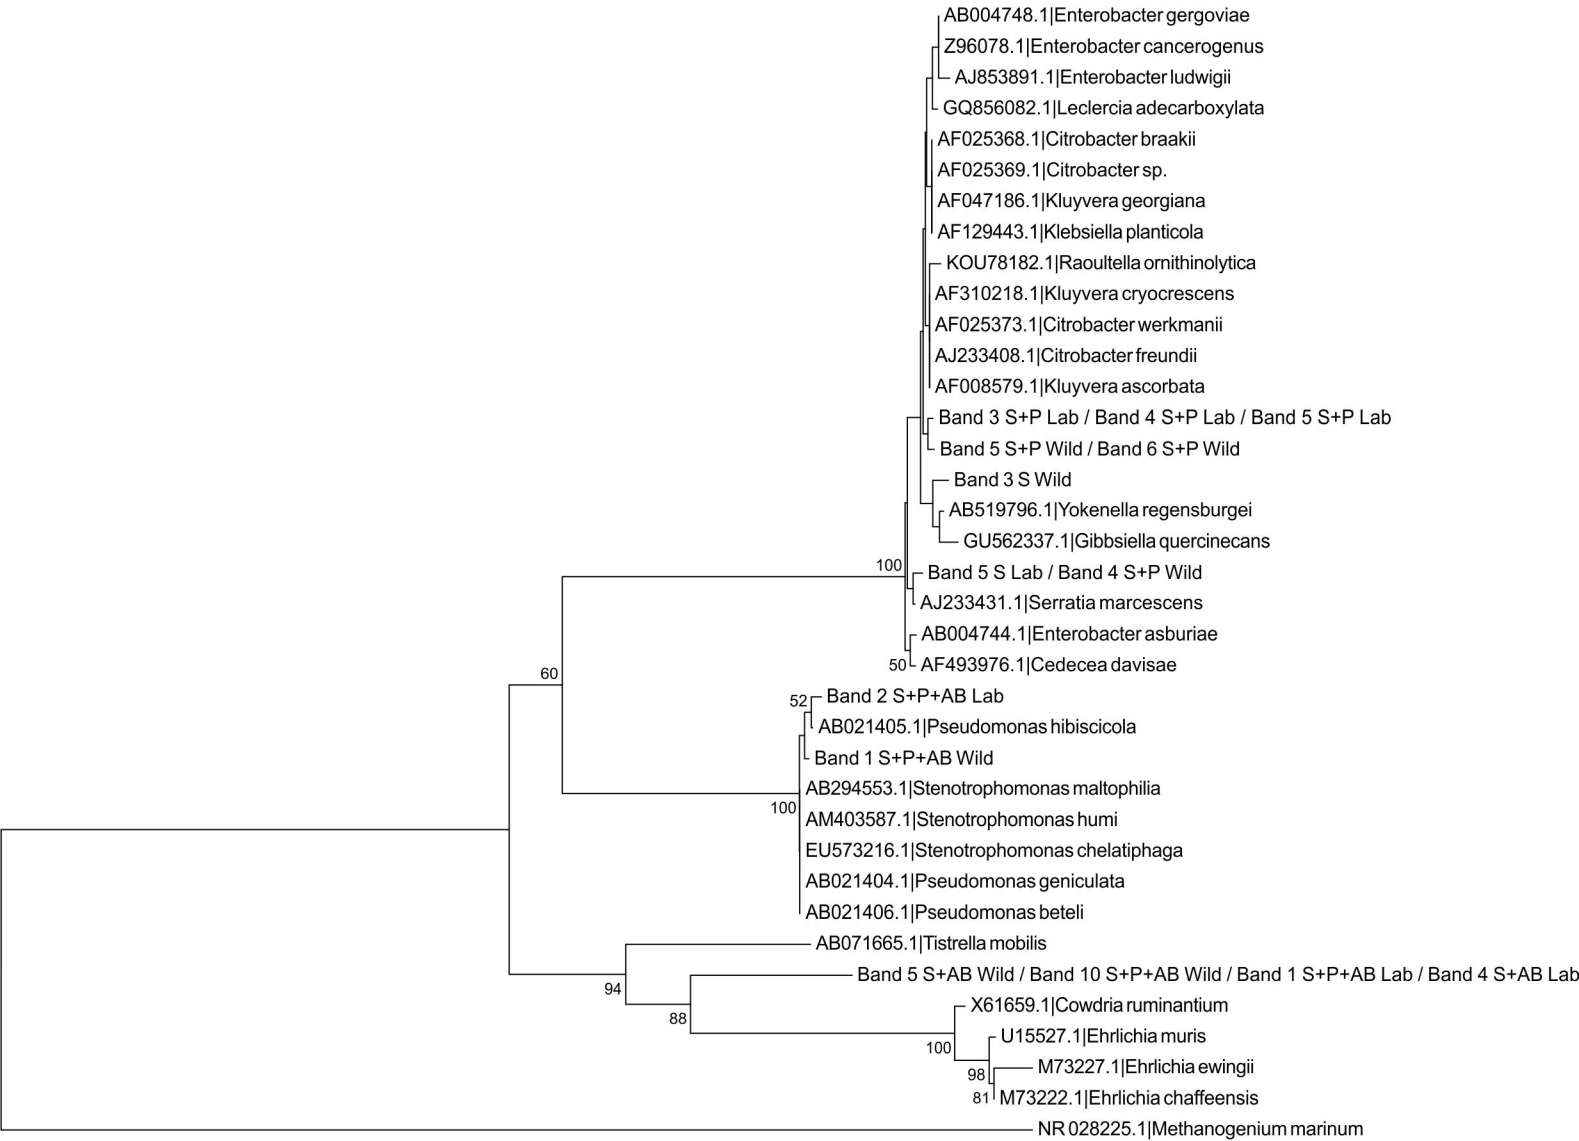

0.1

A

bioRxiv preprint doi: <https://doi.org/10.1101/360693>; this version posted July 6, 2018. The copyright holder for this preprint (which was not certified by peer review) is the author/funder. All rights reserved. No reuse allowed without permission.

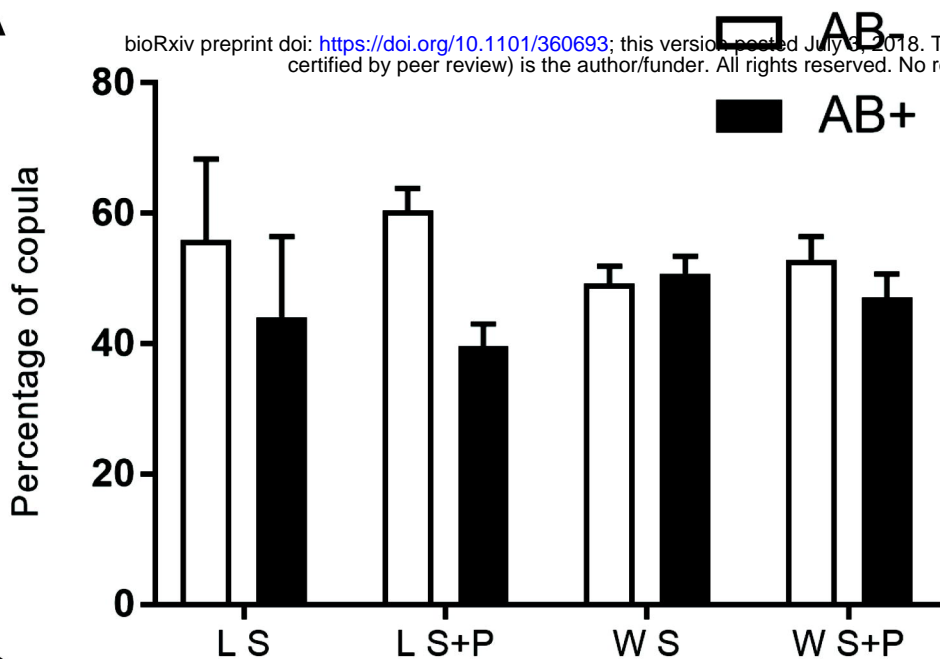

B

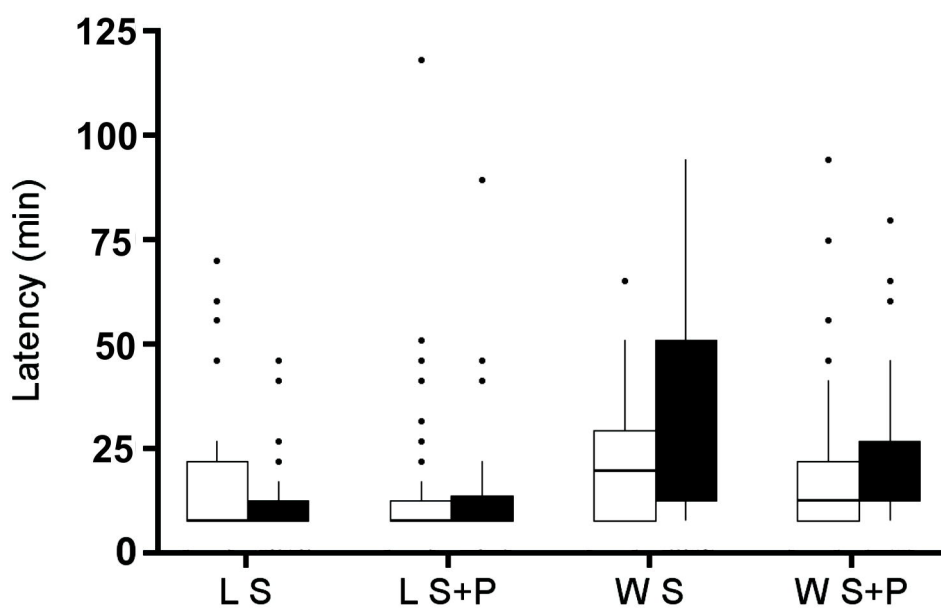

C

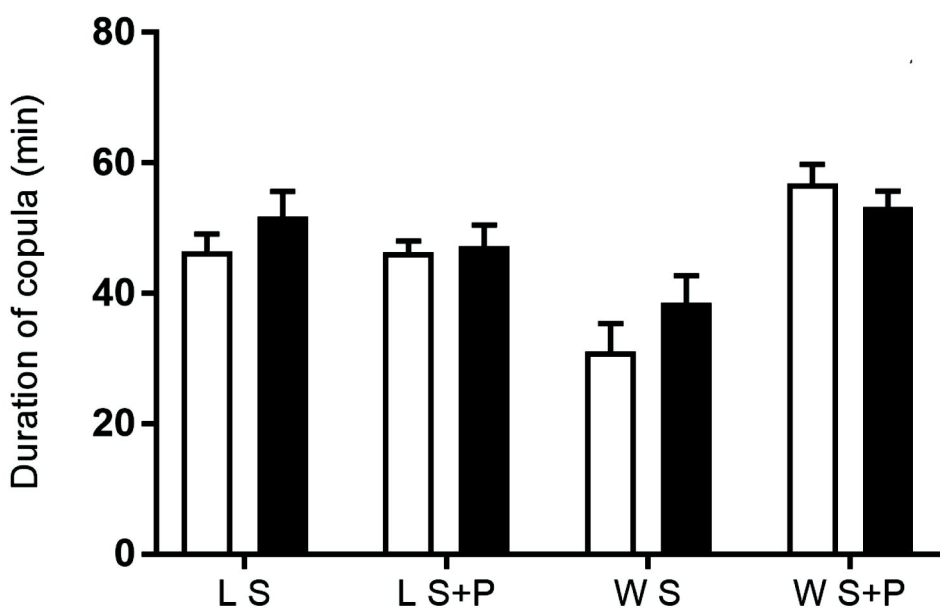

**A**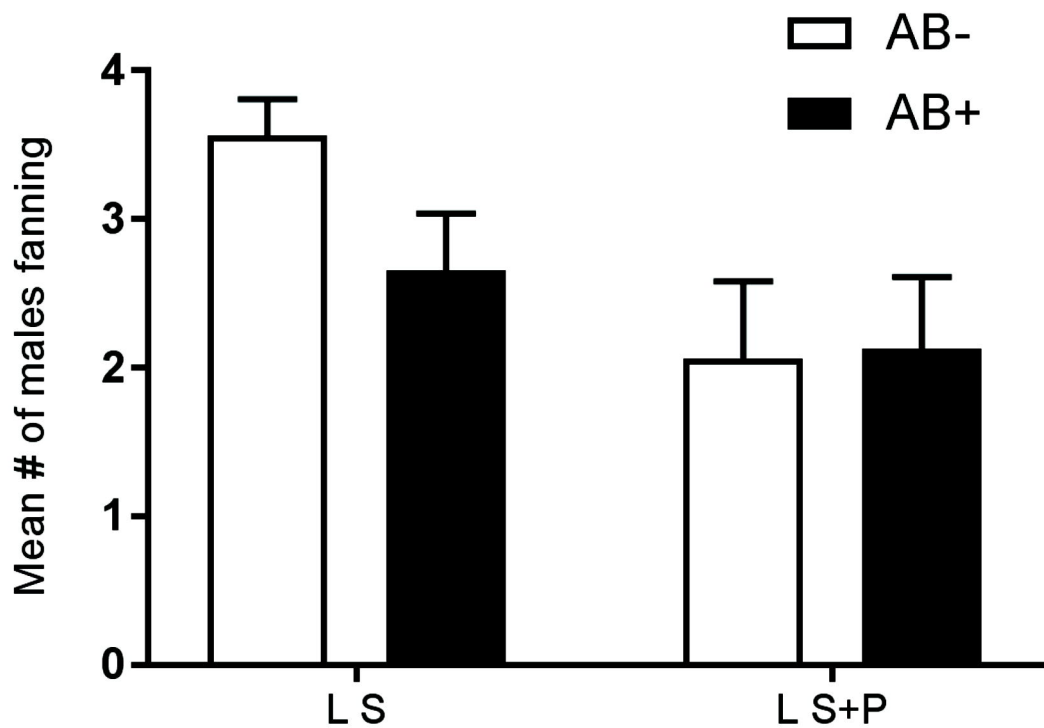**B**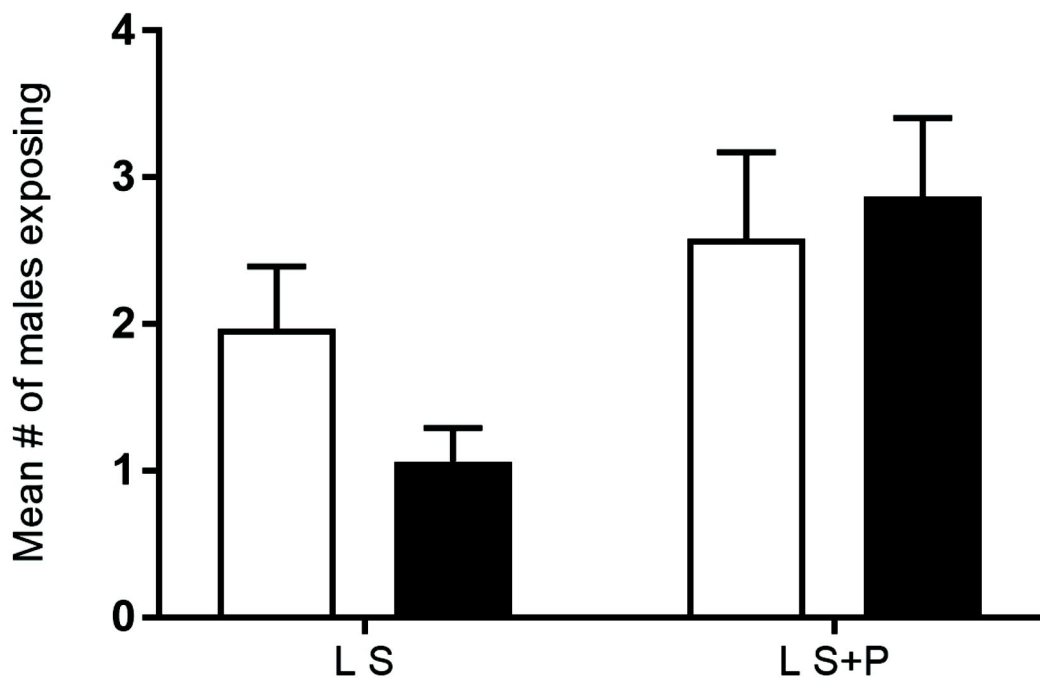

**A**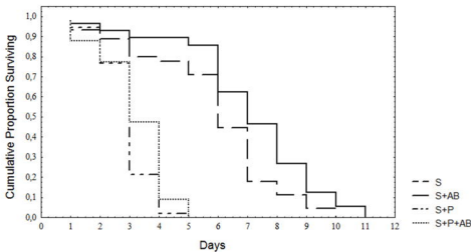**B**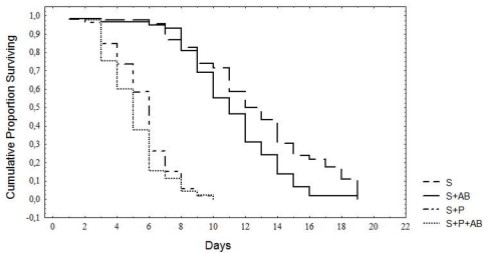

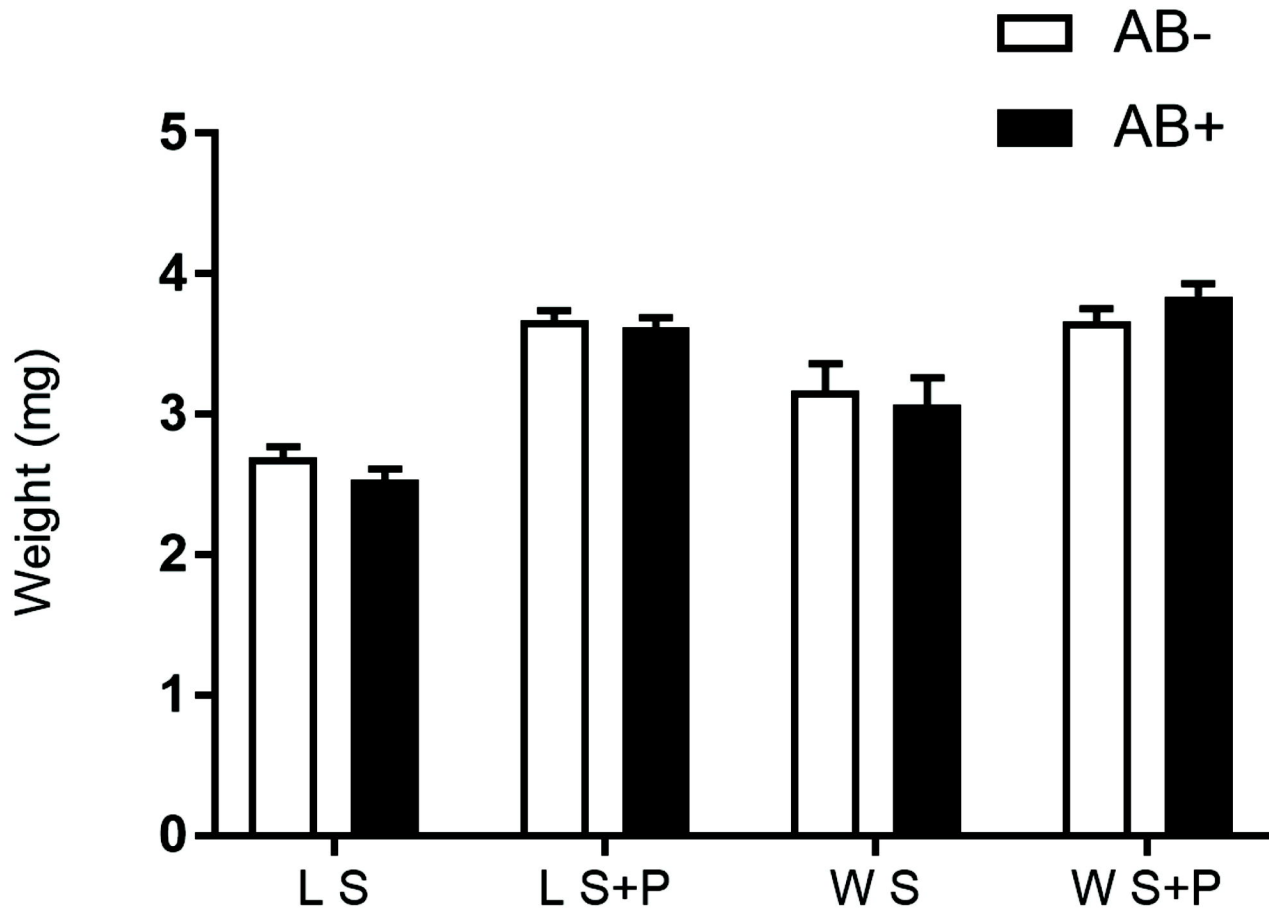

A

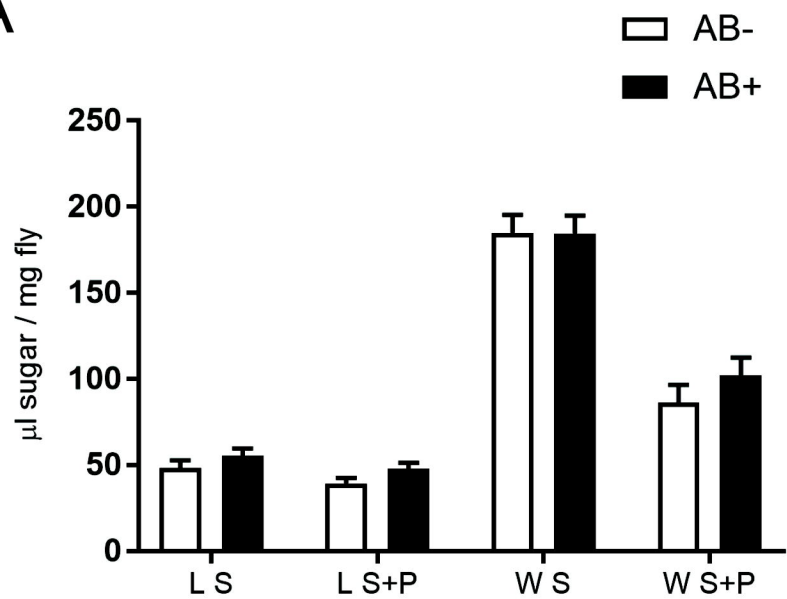

B

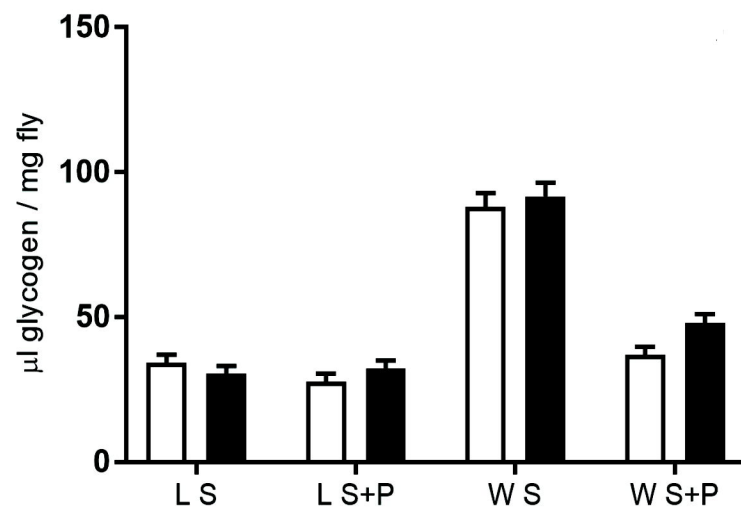

C

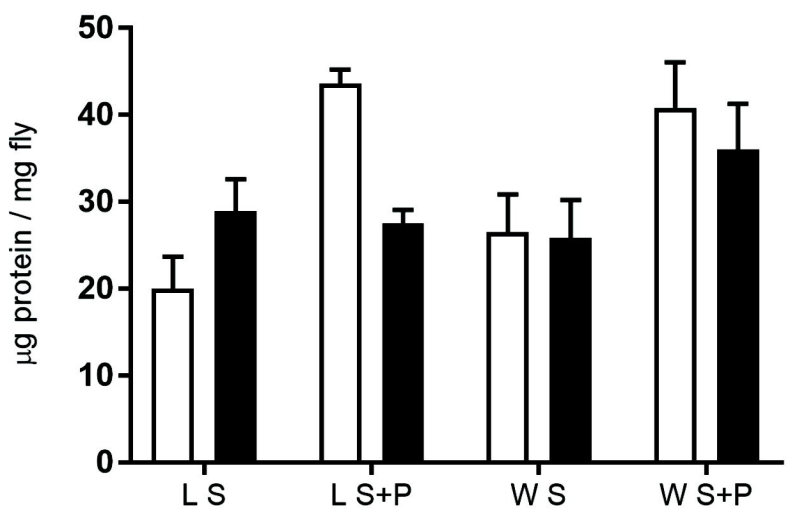

D

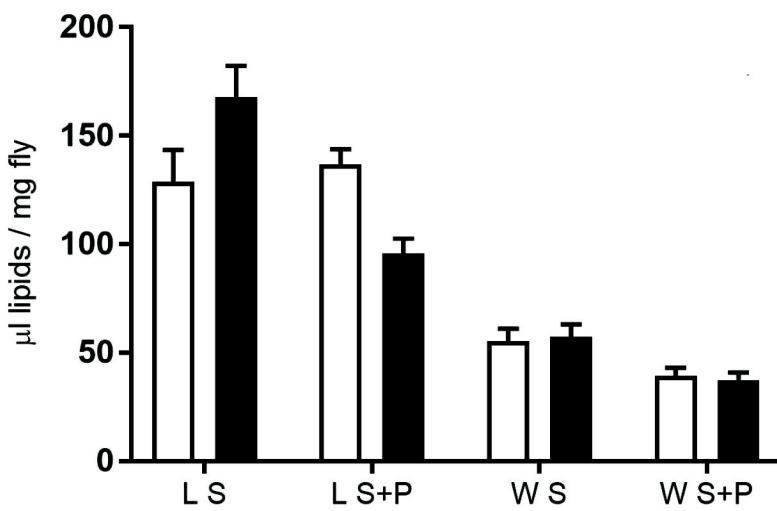

Source: https://www.biorxiv.org/content/10.1101/360693v1.full.pdf
